# Supplementary material for: Antarctic lake viromes reveal potential virus associated influences on nutrient cycling in ice-covered lakes
Source: Front Microbiol. 2024 Sep 10;15:1422941. doi: 10.3389/fmicb.2024.1422941 (PMC11421388; doi:10.3389/fmicb.2024.1422941)
Supplement: Supplementary file 2 [file Data_Sheet_2.xlsx]

## Sheet: Sheet1
contig_id	contig_length	kmer_freq	prediction_type	confidence_level	confidence_reason	repeat_length	repeat_count	repeat_n_freq	repeat_mode_base_freq	repeat_seq
VF_VS_13	86151	1	DTR	not-determined	NA	141	2	0	0.368794	ACAAATGGAGTAAAACTTAATAAAGGAACTGCTGCTGCTGCTAGTATTATATCTGCGGTAGGAGAATCTGGTATAGAAGCTCGTCATGCAAGAAAAGATTTTATTGATAAAATGAAGCATGATAGAAGTATGGGTAATCCT
VF_VS_23	65856	1	DTR	medium	HMM-based completeness (lower-bound) > 80%	141	2	0	0.283688	CAGAAGCTGAACCTGCTCGGCCCCCTTATTCTGTGTCATCCCCAAGGAGGTTCTGCAGGCGCGCGATTTCCTCATCAAGCTCATCTGAATTGCGATGGGTATGTTCGATCTTCTGCTCGGACTTCTCAATGAAGAGGCCTA
VF_VS_41	54501	1	ITR	not-determined	NA	141	1	0	0.35461	ACAACAACCTCTCCAAAACGCTCGAACATGCGCTGCATCATGTTTCATATAATTGCGTACAGAAAAGTTACGCTAATGTAAGACTGTGGGGAAGGGGAGATGTAAGGAAAAAGTTATGAGAGGGGAGAGGGGAGAGGGAAG
VF_VS_45	53216	1	DTR	not-determined	NA	141	2	0	0.276596	TGACTTTGACCGCCGGTATAATTTAGACTGTATTAAATAGCGACTCCAGCTGACCAGCCACCGGCCTTATAAGCTGAAAGTACTTGTTCGTCCTCGATGTATGCGATCCACCCTATTCGGGGTACACCAAATACCCAAGCA
VF_VS_62	47992	1.01	DTR	not-determined	NA	141	2	0	0.269504	CCCTTCCTGGATCACCAGCAGAAGAATCGCACAGCATCAGCTGGGACACTGGAGTTGAGGTTGGGCAACCCGAGCGTGCTCGACTGACACTAGACACACTAAATTCCACGGTCACGCTTTGGAATTGGGTACCTTATGATA
VF_VS_75	44083	1	DTR	not-determined	NA	141	2	0	0.439716	AAGAAGCTGAAAGAATACATAGCAGAGCTACCAATCAATAAGAAATACACAGCCAAGGGAGCCATCAAGGCTACAGCTGAGGCCCTAGAATTTTACCAATCACAAACAACAGATGATATATTAAAAGCATTCTCTGAAATA
VF_VS_76	43824	1	DTR	not-determined	NA	141	2	0	0.319149	ATCAACTTGATCGTGATCCTCGTGGCCTACTGCTGCGATTAAATGTCTAAAAGCTGCATCAAGGATCCGAGATACTTTTATACCTTTTCTATAATTATGCAACCCATATTTGCGGGCCCCTAGCTCCGCTACTTTTCCGAG
VF_VS_79	43074	1	DTR	not-determined	NA	141	2	0	0.340426	GCTGAGTGTATTTGTCGTGCGAGTGACGATCATTATATGGTATCCTCAAGGTCAATGGTTATGGGCAACGCACGTTCATCTTTCGTGATGACAACAATCCGCAACTCATTGTTTCGTGCTTCTCTCGTTGCTCCATTATCC
VF_VS_86	41868	1	DTR	medium	HMM-based completeness (lower-bound) > 80%	141	2	0	0.304965	AAGGCCCAACAGATTACTATGCTGATGTAGACTTACATGGTAACGTAATTGGTAATGCTGGATTGGCTGTACTACCCGGTGATCTGTTATCATTAGGGCAGTATCAAGCTAGTGGGGCATTTAATACAGCTTACTACTTAG
VF_VS_94	40926	1	DTR	not-determined	NA	141	2	0	0.333333	ATCGAGAAACATCACTCCAATAATCAGCTTTACCATCAAATCCATAAAATTTACAAGAACCACTATAATTGGTAGTGTGTATTTTATTATACCTCTTTACCGCCTCGGTTCTTGACTCATTAAATTTGCCACTTTCAAACA
VF_VS_127	35865	1	DTR	not-determined	NA	130	2	0	0.3	AGTATTGCACCCCTTTAACGGCCCGCTGGCGTGCCTCGCTGAGGCGTTCGCCGCATTCCCTGCACTCGGTCAAGGGCTGGAGCAATTCGGCCTTACGCATCATCTGAGAGTGACTGGAGAGGATGTTGTC
VF_VS_128	35772	1.01	DTR	not-determined	NA	141	2	0	0.319149	ACAGGTCAGTACCAGATTATTGCTGGTTCTTCTGTTAACACTTTGGTTAACGGTATGGCGACAGTTACGTTGGATGGTGGCGGGTTCACTAATGGGATGATTTCTGTGGTCATTACCAGCGGTGATACCAGTGTTCCGACC
VF_VS_131	35371	1	DTR	not-determined	NA	141	2	0	0.276596	CCGCCCGTCGCGCCTTGCTCACCAAGGACCAATGACATGACAGAGTGGATGCCCGTGGATTAAGTTCTTTGCGCTTTATGCAAAGAAGTCTCCACCCAACCTATAGGAGAGACGGATGAGTGATCCAATGCGAGAAATCAC
VF_VS_157	32703	1	DTR	not-determined	NA	141	2	0	0.35461	CATTAGCTAACTGCTCGGACTCTTGCCCTGAAATACGTTCTTGAATATCTGAAATTTGCAATAAAGCTGCTGCCCTTTCGTCAAGATTTGCGGAGCTTTTACCCTCTTGTTTAATCCTTAAATCTGAAACGCTTTTAGCTA
VF_VS_161	32095	1.01	DTR	not-determined	NA	141	2	0	0.390071	CAAGAACTAGTTGATTCAATGACTCTAAATGAAAAGATGGAACTAGCAATAGATGCTTATACGTTTGACATCGTTAATAACAACCCTGGTACATTCGTCAACGCAACTTACCTAAAGTGCTATAATGAACTAAAATAACCC
VF_VS_541	18272	1.01	DTR	low	HMM-based completeness (upper-bound) < 80%	141	2	0	0.347518	AGGATTACCCAACTCGTCTGTCCAGACAAATGGGTCAAATTGAGGTTGATAAATGGGAGAGTAAAACTTACCAATAAATGTTTCATACCCGGGATTGACAGCGTAAACAGATACGTGGTATTTACCATATGGCGCATTAAA
VF_VS_676	16157	1.01	DTR	not-determined	NA	141	2	0	0.333333	CATCGGGGCAACACCCTATGGTCGCCCCACCGCAGCAGGTGTAGCTCCTGGTAAAGGTGGCCTGGTGGCAGTGAATGTGGTGAATCAGCCTACTTGGACTGTGACCCCTTCTCTAACCCCCACGCCCACCGCCACGATTGG
VF_VS_798	15066	1	ITR	not-determined	NA	20	1	0	0.6	CCCCAAAACCCCAAAACCCC
VF_VS_1055	13193	1.01	DTR	low	HMM-based completeness (upper-bound) < 80%	141	2	0	0.297872	CCAAGCGTGACCGTATCTATAAGTCCAGTGGTTTCCGATGTAACTGTTAACAATACTACTTCAGTAGTAACAGTAGCAACGGGAGTGACCGTATTACCAGTGGTTTCCAATGTAACCGTTAACAATACTACTTCAGTATTC
VF_VS_1099	12982	1	ITR	not-determined	NA	20	1	0	0.6	CCCCAAAACCCCAAAACCCC
VF_VS_1855	10314	1.01	ITR	not-determined	NA	141	1	0	0.368794	GTATGACGTTAGGATGAGGTAGCTTATTTGACCTGTACTGAAGTTTAGATAAAAGCCTTGACAGTCTTGACTGCATTAGTTAGTATTTAGGGGTAGAGAGAAAACAAACCAAGCCAAAGAGAAACAACCAAGATGACAACC
VF_VS_1877	10251	1.01	DTR	not-determined	NA	22	7	0	0.5	CACACACACACACACACACACA
VF_VS_1953	10023	1.01	ITR	not-determined	NA	141	1	0	0.333333	TATTGCTTTTCTATATAGGGGAATAAGCATAGATATTCCCCAATTAGACCGCGAGGGCTATTTCATGATGCTAATAAAATAGACCCCCTAGGATGGAGGTCTAAATATCGGTTCTAGCTTAATTCTAGAGAATTAATATAA
VF_VS_2023	9865	1.01	DTR	not-determined	NA	141	2	0	0.340426	GGCTTGAGCGTGCCGTTCTTGTCCCAGTTCCGTAATGTATTGGGATGCACCTTTAGCAAATCACTGACCTGCTTGAGTGTTAGATATTCAGATAGTTCTTCTTTAGCCATATAACAATATTGTATAATACTTCACAAGCAC
VF_VS_2247	9402	1.01	DTR	low	HMM-based completeness (upper-bound) < 80%	141	2	0	0.326241	GAACTTGGTGCTCGCCTGTTGGCGAGCGACCATCGGATCAGACGAACAACCGAATGCCGCGAGCGGATTCGTCGTTGTCGGCGCGGCCGCCGTTGAGTTGTCGGTTGACTTCAACCCGCAGCCAACAACCGCGACGGCGGA
VF_VS_2368	9194	1.01	DTR	not-determined	NA	141	2	0	0.319149	GAGTCGGAGTTTGTCGAACATAAGAAAATTGTTGACATGCTCTACAAGTTATCCACGGCAGGTACCGAACACCACAGCAAAATGGAGTACGACTACGTCATCGCTGCAAAGGAAGACCCAACGCTCATGCTGGAGTGGACC
VF_VS_2374	9180	1.01	DTR	medium	HMM-based completeness (lower-bound) > 80%	141	2	0	0.319149	CAGAAGCTGAAAACAGGGTCGATGAAGTTGGTAAAATATCACTACCAGCAGTGCATATCGGCGATGTTTGTAAAACCGAAAGGGAGGATAGACCCCGACACGAACCTGGAGGCCTTGAGATTTCTGACTGATCTAAGGGCG
VF_VS_2433	9067	1.03	DTR	not-determined	NA	49	4	0	0.510204	CCACTACCACTACCACTACCACTACCACTACCACTACCACTACCACTAC
VF_VS_2442	9057	1.01	DTR	not-determined	NA	141	2	0	0.368794	CAGGCCATTGTGCATCCAGAACAATCTGATCATGATTGGCAAGTAGAAACCATCACTGATTGGACTTGTAAGACATATCTAGACACCAAACAACTAATGTTAAAAGTAACTTGGATTGGTGGAGACAAACAATGGGTACCA
VF_VS_2499	8956	1.02	ITR	low	HMM-based completeness (upper-bound) < 80%	20	4	0	0.5	CACACACACACACACACACA
VF_VS_2633	8713	1.02	DTR	not-determined	NA	141	2	0	0.319149	ACTAATAAACTGGAGGCGAACTGGAAGCTGCAGGCGTATTCCGCCCCAGCAGATCAATATATATATCATCACTCATCAGTGATTCGTTTAACCAAGACAGCACCACGCACCTAGCGTGAAGCTGGTTCTTTGAATAAACTA
VF_VS_2654	8682	1.02	DTR	not-determined	NA	45	3	0	0.511111	AGAGAGAGAGAGAGAGAGAGAGAGAGAGAGAGAGAGAGAGAGAGA
VF_VS_2792	8480	1.02	ITR	not-determined	NA	141	1	0	0.347518	TACGGACAGAGTGTTTGCAAGATAAGCTTGGCAACGCCATGTAAATCTTCTGAGATGCACAGTACGAATTGTTTTCTATTCCTTTCTCTTTCACCGTCTTTTGTGAGTTCTTACTGCTGTTTTGATCCACCAGCAAGCAGA
VF_VS_2938	8283	1.03	ITR	not-determined	NA	55	2	0	0.509091	ATATATATATATATATATATATATATATATATATATATATATATATATATATATA
VF_VS_3145	8009	1.04	DTR	not-determined	NA	141	2	0	0.312057	AGGATATTGCTCCCCATCTCCTTCAAATACAGATGGAAGTGGAATTATTGGTATTGCATTCGATACGGTAAACAATGTTACAGGTCTTGAAGCAGGTGGATACGGAGACTATAGCAGTATTAGTGGAGACATTACTACAGG
VF_VS_3173	7983	1.02	ITR	low	HMM-based completeness (upper-bound) < 80%	141	1	0	0.297872	AGCAGCTACGGCGCAATCTATTGCGAAAACCTCAACGTCGATTCTAGTCATGAGTCGCAAGAGTACCCATAGCTTATCTGTGTGAGTTATTTTATCCAAGAAGAGAAACTCCTCATGACTTCCACTGAAGTCTGAATAGTG
VF_VS_3194	7966	1.02	DTR	not-determined	NA	141	2	0	0.297872	CAACGGATAGACAAACAAATCCAGACTATGAAGAAATGCCACCTGAGTCTCTTCGTCTGGCTTTAGCAGGCGCCAACGGTGATCGAAGGAGTGCCACTTAAACTTCTCTTCGAGTGTTTTATCCCAAGCCATGACCCGAAA
VF_VS_3246	7901	1.02	DTR	not-determined	NA	141	2	0	0.297872	AGCTGTGAAGCAGATTGACAGACTCAGAATGTTCGTTAGAACGGAGTTCCAAGTTTAGAAATTATGAGTCTAGTCAAGGTTCTGTAGGTCACTCCTGGGAATGGATACCAGAGTGACTAGTAGTGTGGTTATCCTTAAACA
VF_VS_3270	7867	1.02	DTR	not-determined	NA	141	2	0	0.29078	ACAACTCAACCGAGGTACTTCACCAGTTTGACACCCTGGACGCGCGAAAGGTTCAGAATAAGGGAGTTTTCACGGACGGAACTCAGACGTTTGTGCGGATCTGCAAAAGCCTAGGATTGGATTTTGAAGAGCACAATCTGT
VF_VS_3306	7829	1.02	DTR	not-determined	NA	141	2	0	0.326241	CTTCCTGCTGATGGATGTCCGTACAGATTTTTCCTTAAAACGATGAAGAGTTCTTCGCCCGTATCTGGATGTACCTTTTTGAATCCTGGTGGATACTTCAGAGCGATCAGTTCTCCTTCAGGTAGATCTGCCCAGCAGTAC
VF_VS_3327	7809	1.02	DTR	not-determined	NA	141	2	0	0.333333	GTGGCCCTTTGAATTGCCTTATGCAATTCTAGTTTGATGTTTATCGTTATATTAAATTTAACACGACAAACCAATAATGTCAACTCACGGAGATGACATTTACCATGAATCTTTCTATGGTAGCGGAGATGAAATGATCCA
VF_VS_3364	7765	1.02	DTR	not-determined	NA	141	2	0	0.283688	TGCCACAAGACTAAATACTTAGCACATCACCTGTTGTTTAGTTGTCTGTTCAGCTAGATAGTCAGGTCCGGGCTCTGGTATTGACCCCAGAGCATCTCTTATAAACGACCTAGACTGGTGGGATTCCGTCCTGCAGTCACA
VF_VS_3376	7754	1.02	ITR	not-determined	NA	141	1	0	0.347518	GGTGCGTTAGTCCTGGTCAGCAAGCCGGCACGCCCTCGCGGTCTCGCGGTCGGCCATCACCATGCTCAGGTCGACTGCCAGGGGCTTCGCGCTCGGCAAATCGAAACCGACGCGAATTGTCCATCTACTATCTTGACCCCG
VF_VS_3537	7590	1.1	DTR	not-determined	NA	30	3	0	0.5	TATATATATATATATATATATATATATATA
VF_VS_3778	7380	1.02	DTR	not-determined	NA	141	2	0	0.29078	ATAACTTAGGAAGACAGGAAGGCAAGGCTGTCCCCCGATAGTTTTGCCTTCTTGTTATTTCAAGGATTGCGAAGTCGTCATTCTTGCACCAATAAAACGCTCGCTAAACGCTCGCCAAATAGTTAGAACCGCTTAGAAGTG
VF_VS_3787	7374	1.02	DTR	not-determined	NA	141	2	0	0.382979	AAATGAAGTTCGATAGTGCTTCAAGAATAGAATTAATTGAAAACAAATTCGGATTCATCGTTAGCTTCGGTATAAATCCTCTTCAATTTTTGACTCGTAAAGAATTTAATATTGAGAAAATCAATAACATTTTAATTGACG
VF_VS_3906	7272	1.05	DTR	not-determined	NA	39	4	0	0.512821	ATATATATATATATATATATATATATATATATATATATA
VF_VS_3970	7219	1.02	DTR	medium	AAI-based completeness > 80%	141	2	0	0.368794	AGGCGGGTAAGCGAGTAGCTGGGGTAAGGAAGTCTTACCGGCTGCAGGTACGCCGGTAGTGGGACGAACGGTCGCTCTGGTCCTGCGGCCGCTAGTTTCGGCCGGGCCCGAAGCCGAGCCCTCCTCCACCATGTCGCGAGA
VF_VS_3973	7218	1.02	DTR	not-determined	NA	141	2	0	0.319149	CCACCGCGATCACCGATATGGCCGGCAACCCCGTTAACGCCGTAGCTGAGGGCTGTGCCGCTGTGTCCATAGTTTTTACACCCGATACCACATCCCCGGAGCTGGAGTCGTTCGAATTGAACATGAACGACGGTACCATCA
VF_VS_4156	7106	1.02	DTR	not-determined	NA	141	2	0	0.368794	AACCGTGGAGACGGTGAGATCCGAGGGCGCGTCGTGAAGCGAGCGCGTGGTAGCGATAGTGAGTTCGTGGGACGAGCCCATCGCAATCCCTTGTTGGACACAAGGGAGTATTGGATCGAATTCCCTGACGGAGATCAGGAG
VF_VS_4274	7012	1.02	DTR	not-determined	NA	141	2	0	0.326241	TGACTTTGACAAGAAGATCATAATCAGGCTGCCGGAGTTACCTGCGCAGTTGATTAAGGATGCCAAGAACGCTGCGGCATCGATGCAACCAATCATCGCAGTGAAACACGCAGTGGAACAACTGGAGGAATCAACCGATCA
VF_VS_4296	6998	1.02	ITR	low	AAI-based completeness < 80%	141	1	0	0.375887	CCACAAAAAATGTAGTACCAAAATTCATGTAGTGCTCAATTTCATAATTACCAAAACTTTTGTTTTAATAACTATATGAAGGATTTTTACTGTAATCACGATTAATATAAGAGAGACGGTACCAGCCTTACGCAAGGTGTA
VF_VS_4465	6884	1.08	DTR	not-determined	NA	21	5	0	0.52381	ATATATATATATATATATATA
VF_VS_4468	6883	1.08	ITR	not-determined	NA	27	2	0	0.518519	ATATATATATATATATATATATATATA
VF_VS_4489	6869	1.01	DTR	not-determined	NA	64	2	0	0.328125	AAACAACTGGACGGCCTGCTAAGTGGCTATGAGGACATTTCAGGGCTGATACAACAGCTAAATT
VF_VS_4562	6817	1.02	DTR	not-determined	NA	141	2	0	0.283688	CCGAACATGTGGTCAGGTGCATCACTGTGCTCCATCAGAGCACGGGCAGACTCGAAGGCAAAGTCACAGACTTTCTCGGCTTCATTCAGACTCTGTTGGTGTGGCGGTATGAACTGGTGGTCAATCCCGAGCTGCTTAGCC
VF_VS_4601	6787	1.02	DTR	high	AAI-based completeness > 90%	141	2	0	0.375887	ACCGCCGTCGCGTCCCGCAAGGAACCGACGACGAGGATGGAGCACCCCAACTTCCCCCACAAGATCAATTCATCCAGACCAAAAACCAACCCCGTACCAAGAAGACCAAGAAAGCAGCTGAGCGACCACGAGTCCCCGAGC
VF_VS_4656	6749	1.02	DTR	not-determined	NA	141	2	0	0.319149	TTCGAATGCCACATACTCGTCGAATTCAGCCCCACAATTCTGTAAGGCCAGAGCTGCGCATCCCATGCCATCACACACAGACACGACAACCACGGACATCGCGATCAACGACATCAGCTTGGAGCACTTCAGGGATGGAAA
VF_VS_4697	6722	1.02	DTR	not-determined	NA	141	2	0	0.283688	GAGGCCCAACAACTGAGTTCGTAAATTTGTTCACAGGACTCGTTGTTCACGCTGTCGATAAATGTCCTGCCAACCTATTCAGCTACCAACAGAAGCGTGCTGACGGCAGGATCGTGAAATATCGACGGCTGAAGAGTCAGA
VF_VS_4784	6663	1.02	DTR	not-determined	NA	141	2	0	0.297872	CTGTATAAATCCTACCGTAGGCATACCATTGTAGATACGATGCAAATCCATGCATTACATAAAGTTATGCCTACTGGCTATATATCTAAGGGCCCTGTTCCGGGTTCCGCCACTCTGGCGCCCTTTCCTCAGTCCCCGCGA
VF_VS_5047	6513	1.02	DTR	not-determined	NA	141	2	0	0.326241	CAGTTTACCGATGGCCACCTGGAGGAGTATGCGATGAATACAATTGCAGAAAACATCTACTCACAGATAGACAGCGAAGGACGACGTTTTGTACTTATGGATGAGATCATCGATCATAAGAAAGACGGCTCCGCTATCTAC
VF_VS_5057	6507	1.02	DTR	not-determined	NA	141	2	0	0.439716	TGTAACAAGTGTGAAAACTCTTATAATATTCTTGTTACAGAGTTCTGTTACTTGTTGTTCTTTTGTTTCCAAAAACTGTGCTTTTTTATTTGTTATCAATTTGATTGGGTTTACAACGTGAACAATATCAAATTGATTGAA
VF_VS_5075	6495	1.02	DTR	low	HMM-based completeness (upper-bound) < 80%	141	2	0	0.283688	ACGACCGAGCTCATCCATATGTTTGGTCTTGTACATTTTCACGTCCACGTGTCTCGAACGCTTGTTGGACACACTACCGTGAATCCAGTCGATCTCCGCCTTGTTGTCGACGTAGACGTTGCGGCACGGTCCGACTGGGTA
VF_VS_5078	6493	1.01	DTR	not-determined	NA	74	2	0	0.297297	AAAATCTCCTGTCGGCTGGAAAAAAAGGGGTTCAGGTCAAGTCCCGGCTCAAACGTCGCGCCGAAACGGCGGAC
VF_VS_5106	6480	1.05	DTR	not-determined	NA	34	3	0	0.5	TATATATATATATATATATATATATATATATATA
VF_VS_5180	6436	1.02	DTR	not-determined	NA	141	2	0	0.312057	AGCGTCTTCATCTTCTCGGACTCCGTCACGACGTTGACTTGCATCTTGTCATCGTCAGCATCATCATCACCAACCAAAGTTCCTGGCGGCAGCCACATCGGCAACCAGTAAACATTGCTGCGAATCAGAAGCTGGATCTCG
VF_VS_5182	6434	1.04	DTR	not-determined	NA	23	4	0	0.521739	ATATATATATATATATATATATA
VF_VS_5206	6420	1.06	DTR	not-determined	NA	23	6	0	0.521739	ATATATATATATATATATATATA
VF_VS_5317	6357	1	ITR	not-determined	NA	21	1	0	0.571429	CCCCAAAACCCCAAAACCCCA
VF_VS_5527	6257	1	DTR	not-determined	NA	51	2	0	0.352941	CAACCTTATGGGTCAATATCATACTATATTCATCTTTTACAAACTGCCATC
VF_VS_5532	6256	1.02	DTR	not-determined	NA	141	2	0	0.375887	CAATGTTTATTGAGAATAGAGTCAACAGTTAGTAACTGTCACAAGGGTCAACCATTTTTGGTTAATCCGTGTTCGATGTGTCTTTTGCATCTTCATGTTTTTCAAGCCACTCACTAATTATTAATGCTGCTAGTTGACTCA
VF_VS_5580	6228	1.02	DTR	not-determined	NA	141	2	0	0.333333	AACCGTGCATCCCACCGTTCCGTTTCCCCGTTGTTTCCTGGGTTTTCCAAGCCGCCCCCGAGAATTGAACTCGGGACCTACGGTTTACGAAACCCTCGCCTAACGAGGATATTCCCCTTCGTTTAGTGGCGTTTCGCGGTC
VF_VS_5646	6197	1.05	ITR	not-determined	NA	23	2	0	0.521739	TATATATATATATATATATATAT
VF_VS_5676	6179	1.02	DTR	high	AAI-based completeness > 90%	141	2	0	0.29078	TACGAAGATGGTCAAACTTATCCCATGCAAAACGACAGACGATGCTGAAAAGATTGCTACCCTGTTCCACGAGCGCGTGCTCAGCGAACAAGGCCATCCGCTTTCCATCATCTCTGATCGCGATGTTAAGTTCACGAGTAA
VF_VS_5770	6140	1.18	ITR	not-determined	NA	65	3	0	0.507692	ATATATATATATATATATATATATATATATATATATATATATATATATATATATATATATATATA
VF_VS_5880	6094	1	ITR	not-determined	NA	22	1	0	0.545455	CCCCAAAACCCCAAAACCCCTT
VF_VS_5959	6058	1.02	DTR	medium	AAI-based completeness > 80%	141	2	0	0.382979	ACAGGCATGTTTACTAGCATGCCTTCACATATTCTTTCTCTTCTGTTTTCGTTATCTTTGATACACATTCTTATATATAATATGATTCTCGAATAAACGGAATCATGGAGTTTATCTCTCGAGCGAAGACGTCGCTAATAT
VF_VS_6011	6040	1.13	ITR	not-determined	NA	25	3	0	0.52	TATATATATATATATATATATATAT
VF_VS_6132	5993	1.02	DTR	high	AAI-based completeness > 90%	141	2	0	0.397163	TAACGGATAATGTAACGGTAATACGGTATCAGGTCACACTACCTCCCCTTAAAAGATAACTACGAATTTGGCTAATAGTGAATATTGGGAATTAGCCAAGTAAAAAAAAAAGTTGTTTAAGGACTTGAATATGAATGTTAA
VF_VS_6246	5949	1.01	ITR	not-determined	NA	50	1	0	0.38	GCAGGAACGGAGCAGTAATAAGTATAACTATAAGGTTGTCATAGGAGATT
VF_VS_6351	5910	1	ITR	not-determined	NA	20	1	0	0.6	CCCCAAAACCCCAAAACCCC
VF_VS_6367	5904	1.02	DTR	not-determined	NA	141	2	0	0.368794	AGCAAAACATAGATAGTAATTTAACTGTAATAAGTGCCAAAGGTTTTGAAGGTATTGATAACTATTATTCCAATGCTTCTGTATATTTCTTAGAAGATAGGTCAAATGAATTTGAAAGCTTCTACATATCTAATTTATACC
VF_VS_6373	5901	1.02	DTR	not-determined	NA	141	2	0	0.524823	ACCAGACTGTCATGCATCTCAAGAGAAGATTGACAAGTACACCAAACAGAAGGAAGACGATAAGAAGAAAAATAATTCAAATAAGAACAACAACAATCAAAAGAAAGAACAAACATCAAACGTTGAAATTGCAATGAACAT
VF_VS_6579	5821	1.02	DTR	not-determined	NA	141	2	0	0.276596	CGGGGCGCTTGTACAACCGCTGGCCTACGGACATGGCTTATTAAACTTGAAGGTATCGGATGCTCATACCGTGAAGCGTCCATTGAATTACGAGCATGGCGTAAACAATTCCAGCACGACGAAGCCCAAACGTGTGACGAC
VF_VS_6699	5787	1.02	DTR	not-determined	NA	141	2	0	0.29078	ATAACAGCACAAGCCTTGCCAACGGCTTCAATTTCAGGTACATCAGCAGCTTGTATCAATACAGTTCAACAAGTTACTTTTACGGGCTTAAACGGAACAGCTCCTTATGTATTTTCGTATACAGTTTCGGGAGTTGCAGGA
VF_VS_6834	5745	1	ITR	not-determined	NA	20	1	0	0.6	CCCCAAAACCCCAAAACCCC
VF_VS_6880	5726	1.03	DTR	not-determined	NA	85	2	0	0.505882	CTCTCTCTCTCTCTCTCTCTCTCTCTCTCTCTCTCTCTCTCTCTCTCTCTCTCTCTCTCTCTCTCTCTCTCTCTCTCTCTCTCTC
VF_VS_6916	5713	1.02	DTR	not-determined	NA	141	2	0	0.297872	CACGCCTAGCGCCATCGGTCTGTGTTTTACGCTATGGCCTAGTGCTACGTAGGGCGAAAAACCACTGACGATAATGTGAGCGTGAAAGGCCTCGCTCGTGGGGTGAGGCTCATAGACACGAGCGTATTCGAGTTTTCCGAA
VF_VS_6996	5687	1.05	DTR	not-determined	NA	22	5	0	0.5	TATATATATATATATATATATA
VF_VS_7088	5656	1.02	DTR	not-determined	NA	141	2	0	0.326241	GAAGGTGGTGCTGTTCGCGTACTCGCAGGGCATTGTCAGCAGTCGCGGTATCGAGCGAGCGTGCCAGGACCACGTGACGTTCATCGCGCTGTGCGGCGATACCGCGCCGCACTGCACCACCATCGCGCAATTCGTGAGCAC
VF_VS_7095	5653	1	ITR	not-determined	NA	20	1	0	0.6	CCCCAAAACCCCAAAACCCC
VF_VS_7134	5643	1.08	DTR	not-determined	NA	30	2	0	0.5	TATATATATATATATATATATATATATATA
VF_VS_7193	5626	1.02	DTR	not-determined	NA	141	2	0	0.319149	GCTTTCCAGAGAATACAAACAAGCCTGATCTGACCGTTTATGCGTAAGTCTCTGACCGTTTATGCGTAAGACAGCCTTTTTCGTCTGACCGTTTATGCGTGGATAACTTATTTTATCCACAGGGTTTATGCACAGGCTCAC
VF_VS_7197	5626	1.02	DTR	not-determined	NA	141	2	0	0.29078	CTCGGAAAAGACAGCTATTCCAATCTGGCAAATTGAACCCATGTCAGGGTTAGCGGTCTCGACATCGATTGCAACAAAATTCATGCTCGTTTGCCTTCGGCCTAGACTTCAGTGAACTTGGTTAAATCAGTCGTGAAAACA
VF_VS_7280	5595	1.02	DTR	not-determined	NA	141	2	0	0.326241	TATGTTGTATTTCATTTTTTAATCCTCCGACATTCCACGAACGATTGCCCAGCCAGCAGTGATCCCGAATATAAACATCACTAGATTGATCAACATGACATTAAGCTCCAACAAAAAAATGGGGCCTTTGAAAGCGCCCCA
VF_VS_7366	5569	1.02	DTR	high	AAI-based completeness > 90%	141	2	0	0.340426	AGCGTCTTCCTTCCGTTCTCGAGTGTGAGCTTCTCGGCAGCTCCTAGTCGGGGCTGTTCGCAACCTCCGATGAATTGTTTGATCGTTCCATCTCTTGGCACGATCTCAATTCCGTTTTCCTCAACCCATTTCTTCGTAACA
VF_VS_7396	5560	1.07	DTR	not-determined	NA	141	2	0	0.319149	TGGTGCATACCGATGCGACCACCGGCAAGACCGCGAACTACTACACGGTGCAGCAGGGCCTGACGCGGCCAACCGGGCAGACGGTGACCGCGCTGAACCTGGACTACCAGACGTATCAGGGCGTGGACCTGACGCTGAACA
VF_VS_7457	5542	1.02	DTR	high	AAI-based completeness > 90%	141	2	0	0.319149	ACTAAAACTATAGTAGCCATTACTTTCTGAAAGTAAGATGGAGCTCCTTTTAATCCCATGGGTACTCGTAGCCACTCAAATACACCAAAGAACGTTATAAAAGCAGTCAGCCTACGCGATGCCTCGCTAAGCGACGCTTGC
VF_VS_7542	5519	1	ITR	not-determined	NA	22	1	0	0.545455	CCCCAAAACCCCAAAACCCCAA
VF_VS_7545	5518	1.11	DTR	not-determined	NA	55	3	0	0.509091	ATATATATATATATATATATATATATATATATATATATATATATATATATATATA
VF_VS_7592	5504	1	ITR	not-determined	NA	20	1	0	0.6	CCCCAAAACCCCAAAACCCC
VF_VS_7770	5451	1.04	DTR	not-determined	NA	66	2	0	0.5	ATATATATATATATATATATATATATATATATATATATATATATATATATATATATATATATATAT
VF_VS_7855	5423	1.06	DTR	not-determined	NA	38	2	0	0.5	TATATATATATATATATATATATATATATATATATATA
VF_VS_7870	5419	1.12	DTR	not-determined	NA	31	2	0	0.516129	ATATATATATATATATATATATATATATATA
VF_VS_7887	5412	1.02	ITR	not-determined	NA	21	4	0	0.52381	TATATATATATATATATATAT
VF_VS_8037	5376	1.02	DTR	not-determined	NA	135	2	0	0.333333	CTGGTCGCGGACCAACTGCACGGCGCGGCGCAGATCGTTCGCCTTCATGTCTTCGGCCCAGACAAGGGCCGGAGAACCGTCAGGTCCGATCAGGTTGATCTTGGCCTGCCCGTCGCCAAACACATGCACATGGGC
VF_VS_8094	5361	1.02	DTR	not-determined	NA	141	2	0	0.312057	CAACGTGTGCGGTATGCCGATAGGCACTCTTTCAAGTCTTTCGTCTAAATCTCGCATGTGGTTTTACCCTTCTGGTCTACGCCTTGCGTAGACCTATATATAAGTTCTGACAGTGATAGGGTTACTTAACAAAACCCCAAA
VF_VS_8118	5355	1.03	DTR	not-determined	NA	141	2	0	0.326241	CTATAGCAAATTAAACGGAGAAACTATAATATATGATTCAATGTTTATAGTGTTAAATAGTCGTGGTGGTGTGGCTATGTTACTACTGAGATCAAGTGTAGTCGGTTCAATTATACCTACTGGTTTAACAACCGCTGAACA
VF_VS_8216	5326	1	ITR	not-determined	NA	25	1	0	0.48	CCCCAAAACCCCAAAACCCCTTAAA
VF_VS_8223	5324	1.02	DTR	not-determined	NA	141	2	0	0.276596	GTCAGTGAGTAGCTCCAGAGGGCGTTTGAAGTCTACAATAGCCAAAACTGGCTCCGAAGAGATCGCCTTCTTGAGCCCGACGAAAGCGTGTTCTTGCTGAGATTCCCATCGCCAGGGAACGCTGGCTTTCAATAGTTGGTA
VF_VS_8245	5318	1.03	DTR	not-determined	NA	141	2	0	0.326241	AGACCAAGCACATCAACATACGATATCATTATATTCGTGAACAAGTGGCCGAGGGTACTGTAGACATCCAATACTGTCCTACCGGGGAACAAATTGCCGATGCATTGACCAAGTTTCTCCCTCACAAACAATTTGCATATC
VF_VS_8345	5295	1.02	DTR	not-determined	NA	141	2	0	0.35461	AAACGGATATGTTTGATGGTTCAATGGAATACGAAATTTACGGACGGGATATAGCAGACAGTGACGCAGTAGAAGACGATTTTGAGAGCTACCTAGAACAAGAGACAGGATGTGAAGGCGATGAAATTATCTGTTTCTCAA
VF_VS_8363	5290	1.03	DTR	not-determined	NA	141	2	0	0.361702	AGCAAAACATCAGCTTGCAGTTAGTTCCCCCAAAAAATCATCGAGCAAATAGAGCAGAACGAGCGATCAGAACGTGGAAAAACCACTGGACCGCATTTATGGCCGGAGTAGACAGCAGTTTCCCTAGAAACGAATTTCATC
VF_VS_8370	5288	1.1	DTR	not-determined	NA	24	5	0	0.5	TATATATATATATATATATATATA
VF_VS_8407	5277	1.02	DTR	medium	AAI-based completeness > 80%	141	2	0	0.361702	GCCGAAGCCTACTCTCCACTACCGCCACCATCAACGGGACTACGCACGAACTCCTCCTGGACACGTGCGCCAATGACTCCTTCATGTGTGCGGCGAGTGTTAAGGACTCGGATGGACCCCTGCTGCCTTCGTCGCTGAACC
VF_VS_8436	5272	1.04	DTR	not-determined	NA	32	5	0	0.5	TATATATATATATATATATATATATATATATA
VF_VS_8473	5260	1.02	DTR	low	AAI-based completeness < 80%	141	2	0	0.375887	GTATCAGACACAAGCTTGAAAACGTCTCTCGGACAAGCAAGCGCACGCGGTCGCGTGACGATAAGAAGGAAGAATCCCTCTTTGAACAAAAGAGAGAAACACTTCGAACGCTCACGAAAATGTGACGTCAGAATCACAACA
VF_VS_8476	5258	1.09	DTR	not-determined	NA	24	3	0	0.5	ATATATATATATATATATATATAT
VF_VS_8888	5160	1.03	ITR	not-determined	NA	23	1	0	0.521739	TATATATATATATATATATATAT
VF_VS_8936	5150	1.03	DTR	not-determined	NA	141	2	0	0.312057	ACAGCGTCGCAAGCAACGAGTTTACGAAGCATTTGTTAGCGCTTGTGAGGCACATGAACCGAGATTAACGCCGCCTAGCCGCATTACCTTTTGTCAAGAGATTGAGAAACGAGCAGGAGCGGCTCAAACGCTCAAACGAAA
VF_VS_8983	5141	1.03	DTR	not-determined	NA	141	2	0	0.326241	AGTTGAGACGCCGGAGCTTTGGCATGCCAGGTTTGGTCATCTGGGGATGACAAACTTGGCCACTCTGCAGGCCAAGCAGATGGTACATGGCATGAAGGTAGAAGCTGAGGCATTCAAGGACTTCAAGGATCCCTGCGAGGC
VF_VS_9036	5132	1.02	DTR	not-determined	NA	141	2	0	0.276596	CGGGGCGCTGTTAAGGTATACAAGTTAGATACCAACACAATTGTAGTTAGGAGTAAATTTACTATCATCCCCGCCACTGCTGAACTCATTGCCCGTATGAATGCTATCGCCGACAAGGATCCCCCTGTCGAAGACGCTGAC
VF_VS_9131	5112	1.03	DTR	high	AAI-based completeness > 90%	141	2	0	0.326241	CCGACCGAGAACGGGGTAGGCGAGGCCTTGTCGTCGAGAGCCTCCTGAGCGGCGATGCGGTTCGCGTCATAGTTGACCTTGGCGAACTCGTCCATGGACTTGACGCTGCCGCGCAAGTTCAACATGAACTGGTCGACCGAC
VF_VS_9286	5079	1.03	DTR	not-determined	NA	141	2	0	0.304965	AAACCAGCCGCCGAAAATTCCTTTGCTGTTTTCATTGGCAAAAGGAATTTTGTAATACTTTTGTAATACTAATCGAAGCGGACGGGGCAATGTGTTTGGAATCACAACCCCGAAGGAATAGATTAGTGCCTACGCTGAACG
VF_VS_9424	5051	1.03	DTR	not-determined	NA	141	2	0	0.333333	AAAGCACATTCCTTGTAAATTCATTGAACCTTACACTATGGCTATTTTATTTTTCTCGTGTCACCGCTTGCAGAAGGATGATGGAATTAGTCGCAGCTAAACAAGTTTTGTGATCGGTGCAGTAATTTTAACCCGACTAGG
VF_VS_9501	5037	1	ITR	not-determined	NA	20	1	0	0.6	CCCCAAAACCCCAAAACCCC
VF_VS_9621	5015	1.05	ITR	not-determined	NA	41	3	0	0.512195	TATATATATATATATATATATATATATATATATATATATAT
VF_VS_9773	4984	1.03	DTR	not-determined	NA	140	2	0	0.364286	GTTTTTCACATTACGTTTTTCTGATGATTTTTGATGGTCCTGAGTTGCGGGACAACGTCCAATATGCTATTGCTGCATGAACCTGGATGTAAAAAGATTGACAACAACAACAACAACAACAACAACAACAACAACAACAA
VF_VS_9790	4981	1.02	DTR	not-determined	NA	118	2	0	0.288136	GACGGTGACTCAGGGGCAGAATTCGACGTTTGATAACACACCCGTATTCGCATGGAACGCACTGCCCGGTGCCGTGAAATACGAAGTCCGCATTCAGGATCTCAGTCCCGGTGCCACA
VF_VS_9803	4977	1.03	DTR	not-determined	NA	20	4	0	0.5	TATATATATATATATATATA
VF_VS_9874	4962	1.07	DTR	not-determined	NA	23	3	0	0.521739	ATATATATATATATATATATATA
VF_VS_9897	4957	1.03	DTR	not-determined	NA	141	2	0	0.262411	CAGGGCGTAGGCGATTCTTTTGACCCCACCACAGCCTTCGCAAAATTGGTTGAAGGGCATTCAGGTCTCGATGGGCTTTCTGAGAATCAACAGCCTAAAATTACCGCTTTATACGAAGAGGGGATTTTTAAAGACGCTTGC
VF_VS_10146	4908	1.02	DTR	low	HMM-based completeness (upper-bound) < 80%	138	2	0	0.42029	TGTATTAAAAGTATCACAAAATGAAATGAAATTATCATCTCATTAGCCTCTAACAGCCATACTTTTATCCCATGCAATGCAACTAAAAATGATAATAGGTTTTCTACAAAAAAAGATTGCACGTTACCCTAATATAAA
VF_VS_10172	4902	1.05	DTR	not-determined	NA	141	2	0	0.375887	ACGGCTTCCCTTGCAATAGTCCAGATAGATAGTAGTTAGATAGTAGTTAGATAGTAGTTAGATAGTAGTTAGATAGTAGTTAGATAGTAGTTAGCTAGGTTATTTCAGTAGTATTTTCTTTGTTCACTTCGTTCACGTAAG
VF_VS_10343	4872	1	ITR	not-determined	NA	21	1	0	0.52381	TGTGTGTGTGTGTGTGTGTGT
VF_VS_10415	4856	1.04	DTR	not-determined	NA	40	2	0	0.5	TATATATATACATATATATATATATATATATATATATATA
VF_VS_10649	4816	1	ITR	not-determined	NA	22	1	0	0.545455	CCCCAAAACCCCAAAACCCCAA
VF_VS_10789	4792	1.03	DTR	not-determined	NA	141	2	0	0.304965	AGGATTACAGGCCACTAGTCATAACTGCGATAGACACAAAACCACAGACAGACCTAGTGGCATGGTGTGTTGAGCGCAGGTGGAGTGCCAGGGGTTATGGCAACCCAAGCCACAAACACACCGCACCTGGCTACACAGTGC
VF_VS_10799	4789	1.03	DTR	not-determined	NA	129	2	0	0.333333	CTCTAGTCGCTGCCCGCGTCTCGATGTGACAGAATTCTTCCGGAATTCAGAAATTCAAGCCGGCTCGGGCGGTTTCAGGCGCCGAACGAGCCGACTCCATCGCTGTCTGCAGGCAGCCGCCGAGAGCCC
VF_VS_10920	4766	1.01	DTR	not-determined	NA	68	2	0	0.279412	AGTTGTCTACGCACTGAACGCAGCTGGCTCAGAGGTCTCTTACAAGATCGCTGGCAAGTGGGTTACTC
VF_VS_10963	4759	1.09	DTR	not-determined	NA	39	2	0	0.512821	ATATATATATATATATATATATATATATATATATATATA
VF_VS_10984	4755	1.01	DTR	not-determined	NA	47	2	0	0.297872	CATTGTAAAAATCTGTCCAACTCTCGGTTTCACCCGATGATTCAAGC
VF_VS_11002	4752	1.02	DTR	not-determined	NA	27	2	0	0.518519	ATATATATATATATATATATATATATA
VF_VS_11008	4751	1.04	DTR	not-determined	NA	117	2	0	0.34188	GAACGCTCGAAGCTAACCTGCCAGCCCATAGCGCGTCATCAGCTCATCCAGCGACACCGTGTCGGACTTCCCTGCTCTGACGTCCACGAGGCGCTGTTCTGCAAGGTAGAGGTCTTC
VF_VS_11076	4738	1.05	DTR	not-determined	NA	26	3	0	0.5	TATATATATATATATATATATATATA
VF_VS_11144	4727	1.05	ITR	not-determined	NA	21	4	0	0.52381	TATATATATATATATATATAT
VF_VS_11208	4717	1.05	DTR	not-determined	NA	27	5	0	0.518519	ATATATATATATATATATATATATATA
VF_VS_11218	4715	1.03	DTR	not-determined	NA	140	2	0	0.385714	AGTGTGAATATCGATTCAGAGCGCGCGTACACAGGCGCGATGGCGGGCTTGTACCACGTGCGGCACCGCGTGTATGACCCCGAGATGGGGAAATGGGCGAGAAGAGATCCCATTGGGTACGTGGATGGGATGGGGTTGTA
VF_VS_11327	4697	1.06	DTR	not-determined	NA	27	4	0	0.518519	ATATATATATATATATATATATATATA
VF_VS_11808	4625	1.07	DTR	not-determined	NA	26	4	0	0.5	TATATATATATATATATATATATATA
VF_VS_11862	4617	1.03	DTR	high	AAI-based completeness > 90%	141	2	0	0.319149	ATCGGAAAAGACGACGAGTTTCAAGCGATGATCAAGAAAATCGATGGCCGATTCGTCGACACGTACACAGAAATCTTTGCTGAACTACCAGTCCAAGCGGAGAAAGTTCGTGCCGCGACCAAGTCCGACACTTTGCTACAG
VF_VS_11958	4602	1.05	DTR	not-determined	NA	43	3	0	0.511628	ATATATATATATATATATATATATATATATATATATATATATA
VF_VS_11977	4599	1.03	DTR	not-determined	NA	141	2	0	0.312057	CGCTTACCTGGTCTAGTCGCCAAACAAAAACAGGTAGTCGGTCTCAATATCTAATGCAAAGTATAACCCTACGGCGAGCCACTGGTGAGCCACCTGAAAACAACGCCCCAACACTGGGGGTGAAGCCATGAGTAACGAGGC
VF_VS_12145	4574	1	ITR	not-determined	NA	20	1	0	0.6	CCCCAAAACCCCAAAACCCC
VF_VS_12306	4548	1.03	DTR	not-determined	NA	141	2	0	0.276596	TGTTATGTTTGATGACTGAAGCTACGAATGTATTCACACAATGCATGCATAGTTATGGGGATAGTGGTGGTCAGTCCGGATGGGCCGTTGGCTGGCGGCACATTCGAATGATAGTCACGCCGGTACCTACCTCCTTCAACA
VF_VS_12526	4518	1.05	ITR	not-determined	NA	51	1	0	0.509804	ACACACACACACACACACACACACACACACACACACACACACACACACACA
VF_VS_12567	4513	1.08	DTR	not-determined	NA	30	2	0	0.5	TATATATATATATATATATATATATATATA
VF_VS_12739	4488	1.03	DTR	medium	AAI-based completeness > 80%	141	2	0	0.347518	CGGGGCGGAACAGATGTTCGTAGTCGGTGAAGAGGCGCTCCCAGTCTTGTCCGAGTGCGATGGAGCTGATCTGGTTGCTGTCTAATGTGCGTAGGATTGACCACTCAGGCGCCAGATCGTCGAGCAAGTCGCGGCCCAAGA
VF_VS_12886	4468	1	ITR	not-determined	NA	21	1	0	0.571429	CCCCAAAACCCCAAAACCCCA
VF_VS_13119	4440	1	ITR	not-determined	NA	20	1	0	0.6	CCCCAAAACCCCAAAACCCC
VF_VS_13145	4436	1.01	DTR	not-determined	NA	28	3	0	0.5	CACACACACACACACACACACACACACA
VF_VS_13223	4425	1	ITR	not-determined	NA	20	1	0	0.6	CCCCAAAACCCCAAAACCCC
VF_VS_13493	4389	1.03	DTR	low	HMM-based completeness (upper-bound) < 80%	126	2	0	0.293651	GAATGATCTAACGCTAGAAAACTTTCACGAAAAGACGGGGTTCCGTTTTCGTGTTAGCAACGAACAGTTCGCACGTATCGAAGCTAGTACGTTGACACGAGAACAGGCATTTGCTGAGTTTATTGC
VF_VS_13561	4379	1.03	DTR	not-determined	NA	141	2	0	0.375887	GCAAGCGTGAAGGATATCTACCTAATGACTTTATTAGTAAGTTTAAACACTATGCGAATGAATGTAGAAATACATTAAAAACTATTGATACTAGTAGAAAACCTCCTAGATCTACGCTGCATTTGACTCGTAGAGAGGGAA
VF_VS_13777	4352	1.07	ITR	not-determined	NA	79	1	0	0.506329	TATATATATATATATATATATATATATATATATATATATATATATATATATATATATATATATATATATATATATATAT
VF_VS_14120	4314	1.06	DTR	not-determined	NA	51	2	0	0.509804	ACACACACACACACACACACACACACACACACACACACACACACACACACA
VF_VS_14237	4301	1.06	DTR	not-determined	NA	37	3	0	0.513514	ATATATATATATATATATATATATATATATATATATA
VF_VS_14457	4275	1.14	DTR	not-determined	NA	29	3	0	0.517241	ATATATATATATATATATATATATATATA
VF_VS_14529	4266	1.06	ITR	not-determined	NA	141	1	0	0.425532	GGCACACATACACACACACACGTACGAACACGCAAAAACGCACACTACACTCACGCACGCACACTGCACACCCTCACACACTCACAGGCACACACACACTCACAAACGTAAACACGCACACGCACACTCACACTCACAAAC
VF_VS_14584	4260	1	ITR	not-determined	NA	20	1	0	0.6	CCCCAAAACCCCAAAACCCC
VF_VS_14709	4244	1	ITR	low	HMM-based completeness (upper-bound) < 80%	21	1	0	0.571429	CCCCAAAACCCCAAAACCCCT
VF_VS_14724	4242	1.06	DTR	not-determined	NA	23	4	0	0.521739	ATATATATATATATATATATATA
VF_VS_14980	4216	1.14	ITR	not-determined	NA	47	3	0	0.510638	ATATATATATATATATATATATATATATATATATATATATATATATA
VF_VS_15531	4162	1.03	DTR	not-determined	NA	141	2	0	0.411348	ACACACACATACACACACACTTATGCACGTCGCACACACGCACACACACTCATATGTAAACACACATACGCACACGCACACGCACGCAAACACACACGCACACGCACGCACATGTACACGCACACACACACAAAAAATATG
VF_VS_15555	4159	1.04	DTR	not-determined	NA	141	2	0	0.304965	ATGCGAACGCATATGCCAACGCAATGCGAACGCATATGCCAACGCAATGCGAACGCATCGCTAGATGGTGTTCACGATTCATCATCGAACGATCATCGCTCGTTCATCGAACGATGAACCAATGGTTGAACCAATGGTTGA
VF_VS_15587	4156	1	ITR	not-determined	NA	21	1	0	0.571429	CCCCAAAACCCCAAAACCCCA
VF_VS_15629	4151	1.03	DTR	not-determined	NA	141	2	0	0.404255	ATTACGTCTCTCTCTTGCTCTGTCCAAGCTTGGATACCGTTTCTAGGCATTAACTGAGTTGTACTAGCATGAGCTTTTCTACGAGTATTAACTGTCTTCAAGCTTCTACTAAATTCTTTTTCGTACTCTACGAATTTATTA
VF_VS_15656	4148	1	ITR	not-determined	NA	20	1	0	0.6	CCCCAAAACCCCAAAACCCC
VF_VS_15661	4147	1.1	DTR	not-determined	NA	31	2	0	0.516129	ATATATATATATATATATATATATATATATA
VF_VS_15757	4138	1.09	DTR	not-determined	NA	57	2	0	0.508772	ATATATATATATATATATATATATATATATATATATATATATATATATATATATATA
VF_VS_15763	4137	1.03	DTR	high	AAI-based completeness > 90%	141	2	0	0.340426	CTACTGCTGGCGTTGATAACACGCTTTTGTTGGCGTATTTGGCGAATACTCCAATCTTTCAATGCGAATGCACCGTTCGCGAGATTACTCCGTATTTGGCGATTAGTGCGTCTGTTCAACGTCCGCAGTTTGTCGATCTTA
VF_VS_15838	4129	1.03	DTR	not-determined	NA	141	2	0	0.304965	ATCTCGACACAACCGATTATTGCTGGGACTCGCCCTGCTTTCACAAGCGCTCGGGATAGATATTGCACAAGCCGATTTGTTACTTGACCCCAACTTTGGGCCAGCAACCTACGGTCATTTCTGCCCAGCGTTGGCACGGTC
VF_VS_15853	4127	1.04	DTR	not-determined	NA	141	2	0	0.333333	GTTGTTCGTTACAAATCACACGGCGATAACCTCGCCTTTTTTAACTTTCGCCAGAGGATTGCTCCCACATCTGGAAAACTCGAAAGTAAAATACTCAAATGGCTTACAATTTACACTGATGAAGTGAAAACGAAATCCCTA
VF_VS_15907	4122	1.03	DTR	not-determined	NA	141	2	0	0.35461	CGGTCAACGGCTCGGCTGGCATGCTGGGGCTCTCCACTGGTCAGGGGCTGTGTGTCAACAGCAGCCAGCATGGCTGCCATCACGCTCTGACCAGTGGAGACCCATCACCTCACGGTGTTGCCGTCACCCCTTGAACCCGCC
VF_VS_16002	4111	1.08	DTR	not-determined	NA	24	4	0	0.5	TATATATATATATATATATATATA
VF_VS_16215	4091	1.03	DTR	not-determined	NA	141	2	0	0.297872	AAACGGGTCGGCAACTGTTTGACAAACTGACTCATATCTACAGGAAAGAGTCGGGAGGCGATTCCTGACAGATTGATGAGCCAATTGCAAAACCTCCGTAAACGGGGCATTCCTGCCCCGTTTAGAATCACCAAGGGCCAG
VF_VS_16465	4067	1	ITR	not-determined	NA	28	1	0	0.571429	CCCCAAAACCCCAAAACCCCAAAACCCC
VF_VS_16553	4058	1.03	DTR	not-determined	NA	140	2	0	0.357143	GAAAATAATATTGTTGTACCTAGCCATCATTAAAACGAGCGAGGCTCTGGAAACAAACATTTTAGAATATCGAACCCTAGCTACCTTAACTTCTTCTAAAGTATGGTACATGCACCTTAGATCATTACCTAATTACATTA
VF_VS_16587	4055	1.05	DTR	not-determined	NA	31	2	0	0.516129	ATATATATATATATATATATATATATATATA
VF_VS_16722	4043	1.1	DTR	not-determined	NA	25	7	0	0.52	ATATATATATATATATATATATATA
VF_VS_16851	4030	1.03	DTR	not-determined	NA	119	2	0	0.403361	ATTATGACCCGTCCTGAAATAAGGCTACATAATTTTAAACATTATGTATAGAAATGACAAAGTAATTAGACGTTACAGTGAACCTTTTAAATTAAAAATTTTAGCCGAACTTACAATCG
VF_VS_17084	4006	1.06	DTR	not-determined	NA	26	6	0	0.5	CACACACACACACACACACACACACA
VF_VS_17137	4002	1	ITR	not-determined	NA	20	1	0	0.6	CCCCAAAACCCCAAAACCCC
VF_VS_17240	3990	1	ITR	not-determined	NA	20	1	0	0.6	CCCCAAAACCCCAAAACCCC
VF_VS_17374	3979	1.05	DTR	low	Repetetive TR sequence	22	9	0	0.5	TATATATATATATATATATATA
VF_VS_17457	3971	1.11	ITR	not-determined	NA	33	1	0	0.515152	TATATATATATATATATATATATATATATATAT
VF_VS_17498	3967	1.03	DTR	not-determined	NA	119	2	0	0.378151	AAGTGGTTCCAGAAGTTTAAGTGGATTCCTTAGAGAAGAAGAACAGCGTTGACGATCTACAAGCGTGGATTAATAGACAATCTGAGATACTAATAACCAATACCGATCATCAAATTCAG
VF_VS_17742	3946	1.03	DTR	not-determined	NA	141	2	0	0.297872	CGAGAGGCTGACAGTGTGGATCTCTGGCTACCGGCCGAAGTCAGATAACTGGATAGCGAATAATCCCGGCGGAAATTGCGCTGGCCTTCCCGCTAGACATCAGCTGATCTATCCCGACACCGCCGGTCGAGGCTCGGTCGA
VF_VS_17941	3929	1.08	ITR	not-determined	NA	39	2	0	0.512821	ATATATATATATATATATATATATATATATATATATATA
VF_VS_17982	3926	1.03	DTR	not-determined	NA	129	2	0	0.27907	ACATAGAACGCGAAACTGGAGTGTGGATAATCCACGGCATCATCGGCCAAGTGCCATTTCTTGCTCGCGGCTTTGGCGTGGATGTTCTGTAGCTTCTGCTCGGTCATCTTCCCGCTGCAGAGTTCCACC
VF_VS_17983	3926	1.03	ITR	not-determined	NA	21	5	0	0.52381	TATATATATATATATATATAT
VF_VS_18020	3923	1.08	DTR	not-determined	NA	39	2	0	0.512821	ATATATATATATATATATATATATATATATATATATATA
VF_VS_18055	3920	1.03	DTR	not-determined	NA	141	2	0	0.390071	TAGAACTAGCGGTTTTATCTATATAGCATCCTGCCCAGTCTTGAAGTTCTGCTTTTAAGTAGGCTTCGATTAGCGCTTTCCCATATAAAAGGCTATTGTGAAAAGTTATTCCTTTTTGATTTTTTATTAATACAGGCTCAA
VF_VS_18281	3904	1.16	DTR	not-determined	NA	78	2	0	0.5	TATATATATATATATATATATATATATATATATATATATATATATATATATATATATATATATATATATATATATATA
VF_VS_18345	3899	1.01	DTR	not-determined	NA	46	2	0	0.413043	CTGGCTATACCGATCCCCTCCTCTTCCTCTTCGAACGGACCCATAA
VF_VS_18398	3894	1.04	DTR	not-determined	NA	141	2	0	0.297872	ACACCAAATTAAGAGCCCTAGCGAAAGCTGGGGTTTTTAATTTGGTTAATCTGTAAGAATGAGAACCGTCCGGCGGAGCCGAGGTTCGATGACCAAGTTTGCTCGCAGGTGCTTGCACCGAGAACGAACGCAGGGCAGTAG
VF_VS_18446	3890	1.02	DTR	not-determined	NA	110	2	0	0.372727	CATCAACTCCTCTATTTTTTGCACTCTTTAGAATACTATGTAATTCAGCAACAACATCTTCTTTTATACCAGATTGAATTCTAAGATTGTGGCTTAAGTCGTCGATAAGA
VF_VS_18687	3868	1.09	ITR	not-determined	NA	49	3	0	0.510204	ATATATATATATATATATATATATATATATATATATATATATATATATA
VF_VS_18691	3867	1.06	ITR	not-determined	NA	25	6	0	0.52	TATATATATATATATATATATATAT
VF_VS_18769	3860	1	ITR	not-determined	NA	22	1	0	0.545455	CCCCAAAACCCCAAAACCCCAT
VF_VS_19027	3838	1.12	ITR	not-determined	NA	141	1	0	0.319149	GATGCTGGTCGGTTCTTGTCTTCTTGTCCTTAGGCTTAGCAGCGCTTACCGTGCGAGCCGCAAATCATATATCGGTATATTCTCATTGGCTCACTCTGCTCTGGCGCCACTCCTCGCACGCGCACCCATACACTTACATCA
VF_VS_19050	3836	1.03	DTR	not-determined	NA	24	2	0	0.5	TATATATATATATATATATATATA
VF_VS_19440	3804	1	ITR	not-determined	NA	20	1	0	0.6	CCCCAAAACCCCAAAACCCC
VF_VS_19561	3795	1.07	ITR	not-determined	NA	29	1	0	0.517241	TATATATATATATATATATATATATATGT
VF_VS_19722	3783	1.07	DTR	not-determined	NA	29	2	0	0.517241	ACACACACACACACACACACATATATATA
VF_VS_19743	3782	1	ITR	not-determined	NA	20	1	0	0.6	CCCCAAAACCCCAAAACCCC
VF_VS_20125	3756	1.07	DTR	not-determined	NA	23	5	0	0.521739	ATATATATATATATATATATATA
VF_VS_20180	3753	1.07	DTR	not-determined	NA	33	3	0	0.515152	ATATATATATATATATATATATATATATATATA
VF_VS_20325	3742	1.22	DTR	not-determined	NA	57	2	0	0.508772	ATATATATATATATATATATATATATATATATATATATATATATATATATATATATA
VF_VS_20334	3742	1.06	DTR	not-determined	NA	33	3	0	0.515152	ATATATATATATATATATATATATATATATATA
VF_VS_20353	3740	1.04	ITR	not-determined	NA	49	1	0	0.510204	TATATATATATATATATATATATATATATATATATATATATATATATAT
VF_VS_20455	3734	1	ITR	not-determined	NA	22	1	0	0.545455	CCCCAAAACCCCAAAACCCCTT
VF_VS_20532	3727	1.09	DTR	not-determined	NA	26	3	0	0.5	TATATATATATATATATATATATATA
VF_VS_20628	3720	1.06	DTR	not-determined	NA	141	2	0	0.276596	AGCCGCAGTCGCTGTGATTGCAGCAGCAGGAGTTACGCAGACGGCAGCGGATACGACTGCTGAGTTGAAAGTTGCAACTGCAGCCAAAACACAGGTGTGTTTGCACACACACTGTCTTTGCCTCTCTCGCGCTCTCTCTTG
VF_VS_20647	3719	1	ITR	not-determined	NA	20	1	0	0.6	CCCCAAAACCCCAAAACCCC
VF_VS_20663	3718	1.01	ITR	not-determined	NA	31	1	0	0.516129	TATATATATATATATATATATATATATATAT
VF_VS_20665	3718	1.04	ITR	not-determined	NA	39	1	0	0.512821	ACACACACACACACACACACACACACACACACACACACA
VF_VS_20832	3707	1.03	DTR	not-determined	NA	101	2	0	0.376238	CCGTTTGCATCTGTTACACATTTCAGTTATGGCTGAAATGTGTAAATATGAAAAATCTCTATACTTGCGATGGCAGATGATGTTAATGTATAATTTGTGTA
VF_VS_20844	3707	1.04	DTR	not-determined	NA	29	3	0	0.517241	ATATATATATATATATATATATATATATA
VF_VS_20852	3706	1.03	DTR	not-determined	NA	20	6	0	0.5	ACACACACACACACACACAC
VF_VS_20926	3701	1.01	ITR	not-determined	NA	33	1	0	0.515152	TATATATATATATATATATATATATATATATAT
VF_VS_21091	3692	1.03	DTR	not-determined	NA	141	2	0	0.319149	GACCGTGCCAGCAACTGCGTTCTCCAGGGAGTCGGCGGCGCGAATGCTACGGTATGGGGAAACATGGAGAACATTTCAGATCAACTGATGGAGAACAAGCAATCTGGATGAGGCGCTTGCGTCGAGTACCACCGAAGAGTC
VF_VS_21109	3691	1.18	ITR	not-determined	NA	71	2	0	0.507042	ATATATATATATATATATATATATATATATATATATATATATATATATATATATATATATATATATATATA
VF_VS_21239	3684	1.02	DTR	not-determined	NA	25	4	0	0.52	ATATATATATATATATATATATATA
VF_VS_21527	3665	1.13	DTR	not-determined	NA	31	4	0	0.516129	ATATATATATATATATATATATATATATATA
VF_VS_21532	3665	1	ITR	not-determined	NA	20	1	0	0.6	CCCCAAAACCCCAAAACCCC
VF_VS_21602	3660	1.03	DTR	not-determined	NA	49	2	0	0.510204	ACACACACACACACACACACACACACACACACACACACACACACACACA
VF_VS_21723	3652	1.03	DTR	not-determined	NA	141	2	0	0.333333	GGCGGCGGTGGTGAGTGCCCTGACCCGTGTACCCCTACCGATTACGATTTAATTCGTCAGATCACGTTTGAGGAGCTTGACGAAAAGTTCCCCCCAGCGCGTCCGTTTTCCCTCCAAACCATCCAACTACCCGCTTCAAAC
VF_VS_21732	3652	1.03	DTR	not-determined	NA	141	2	0	0.312057	CATTCACGGTTACAGTGCTTTCGAGGTCAAATGGGGGAGGCCGCCTGTCTTTGATCCGAAAAGCGCCTATGACCCTCACCTGGAATGGCGCACCGGGCAAGTCCAAGGGGTACTCATGCGATGGAACCGGGATGTTTTGCG
VF_VS_21737	3652	1.04	DTR	not-determined	NA	141	2	0	0.269504	AGGTGTGCAACCCTTCTCACCAATGCTCTATAACCCCTGCCTGGAATGTCATGCCCTATCCATCTCTGGGGTGCATGAGTCCCATTCTAGCGATTCTCTGAGGGAAGTCAAGAAGATAGATACAGAGACATTCCAGGCAAG
VF_VS_21738	3652	1.04	DTR	not-determined	NA	141	2	0	0.312057	CATTCAAGTCGGCAGAGGTACCCAGGGAGACCCTGTGGTCACAACCGTTCACGACACAATCACAAACATCACCAACATTACCCAGGTGAACGATTACAGGGAGAGAATCCCCCCACAGGTGGTCACATGTGACGCTGAACC
VF_VS_21740	3652	1.04	DTR	not-determined	NA	141	2	0	0.283688	AACGGCACCGGAGAAATTGGGGTTACCTGCTGACCTTTGTCCTGATTCCCAATCACGTAGAGCGCCAGCGCCAGCGCAAACAGCATCAAGTATTCCGTTGGCAATGCTGGAGGCCGGATGAATCGGCGGCAATCGTCTTGT
VF_VS_21742	3652	1.04	DTR	not-determined	NA	141	2	0	0.340426	AAAAATTCCATACCGTACAGAAAACAACCTCTCTGGGAAGCTTCGGCCTTCTGGGAGGTTTTCCCTTATCCAGATATTCCGCAAGAAAAGTAAAAGGGTAATGTCTCATGAAAAGGAAATTCAAGCACCATCAGTTCTGCA
VF_VS_21986	3636	1.13	DTR	not-determined	NA	22	5	0	0.5	TATATATATATATATATATATA
VF_VS_22020	3634	1.09	DTR	not-determined	NA	36	5	0	0.5	CACACACACACACACACACACACACACACACACACA
VF_VS_22127	3627	1.03	ITR	not-determined	NA	141	1	0	0.411348	TTATATACAAAGAAAGTGTCAATAAATTAATACAATTATACAACGATACAAAAAAGTTAATTCAAATAAAGATCAATTAATTTAGAAGCATTTCTAGTGCTTCCTCTTTTTGGTTTTGAAGGAAATCGTTGAATTTCATTA
VF_VS_22180	3625	1.03	DTR	not-determined	NA	114	2	0	0.280702	AACGGCACCGGAGAAATTGGGGTTACCTGCTGACCTTTGTCCTGATTCCCAATCACGTAGAGCGCCAGCGCCAGCGCAAACAGCATCAAGTATTCCGTTGGCAATGCTGGAGGC
VF_VS_22265	3620	1.1	DTR	not-determined	NA	23	2	0	0.521739	ATATATATATATATATATATATA
VF_VS_22386	3613	1.03	DTR	not-determined	NA	141	2	0	0.333333	ATTCTCCGCAGCGAGACTCGCGCTGGCTGGACGATCAAGCAAGCGAAACGCGCTCTCGTCGGATTGCCGTATGGGAAGCATTGTCCGCGAAAGCCGATGGACGCGCGCTCGCGAAAGGTGGAAGAATGAGCCACGCGACGA
VF_VS_22421	3611	1.02	DTR	not-determined	NA	30	3	0	0.5	CACACACACACACACACACACACACACACA
VF_VS_22601	3599	1.07	DTR	not-determined	NA	36	3	0	0.5	TATATATATATATATATATATATATATATATATATA
VF_VS_22873	3583	1.03	DTR	not-determined	NA	26	2	0	0.5	TATATATATATATATATATATATATA
VF_VS_22995	3575	1.12	DTR	not-determined	NA	37	3	0	0.513514	ATATATATATATATATATATATATATATATATATATA
VF_VS_23258	3559	1.04	ITR	not-determined	NA	141	1	0	0.319149	CTCTTCCGCATCCGGAACACGCAGGGCAGCACCATTCCCTGGCCGGTGACGTTCTCCTGGAGTGCCTATGCTGGCTGGAGCGAGCGTGCCTCAGTGAGCATGAACGGTGCCAACACCTGGAACAGCGGCGGCAGCTCAGTA
VF_VS_23276	3558	1.11	ITR	not-determined	NA	27	1	0	0.518519	TATATATATATATATATATATATATAT
VF_VS_23295	3557	1.04	DTR	not-determined	NA	141	2	0	0.326241	GCAAACTCTACAAGTGCAAATTTAGAACTGAGGTGAAGCCATGAACCGATGTCAAATGCAACGAATCCCCAAAGCGGGTCAGATTCTCTGGTACATCGACCTTTCACAAATTCAGAGTCGATCGGTGAATGAGACGCTTGA
VF_VS_23489	3547	1.08	DTR	not-determined	NA	23	5	0	0.521739	AGAGAGAGAGAGAGAGAGAGAGA
VF_VS_23605	3540	1.08	ITR	not-determined	NA	31	2	0	0.516129	CACACACACACACACACACACACACACACAC
VF_VS_23680	3536	1.08	DTR	not-determined	NA	38	3	0	0.5	TATATATATATATATATATATATATATATATATATATA
VF_VS_24028	3513	1.04	DTR	not-determined	NA	141	2	0	0.35461	ACTCGAATTTACGCTCATAGATTTTACGAGCAATTTCATATCTATCTTTAATTCTGAAATCACAATCAAAAATATCTGTAGGCTTACGATAGACATTTTGTAACCCTACAGATATTTGGTTATTAATAGAGAAGTTGACAA
VF_VS_24120	3507	1.01	DTR	not-determined	NA	26	2	0	0.5	TATATATATATATATATATATATATA
VF_VS_24145	3505	1	ITR	not-determined	NA	20	1	0	0.6	CCCCAAAACCCCAAAACCCC
VF_VS_24183	3504	1.04	DTR	not-determined	NA	141	2	0	0.276596	CCAAGCGTCTAGGGTAGCTAAGTGCGAAACCACATAGAATCTGCGGGCATCCGTTTTCTTAACTAATCCCTGTCGCAACAAATGGGTGATGATCCTTGAAACCAAGCCAGAGGTGGCCCCAGTTCGTTTCACCAGCTCAGC
VF_VS_24308	3497	1	ITR	not-determined	NA	20	1	0	0.6	CCCCAAAACCCCAAAACCCC
VF_VS_24457	3488	1.04	DTR	not-determined	NA	141	2	0	0.319149	CGAGTGTAATAAATCCACACCAGAGAATTTGCTGATAGAGCAAAGAATATCTCGCCAGAGGGAAACAAGCTCATCACCAAGTGACTCACCCATTCTTTTGTTTTGATGGTAGAGGCAGATATGGAGGTGCAAAGCGCCCCG
VF_VS_24528	3485	1.07	DTR	not-determined	NA	55	2	0	0.509091	ATATATATATATATATATATATATATATATATATATATATATATATATATATATA
VF_VS_24785	3470	1.07	DTR	not-determined	NA	57	2	0	0.508772	ATATATATATATATATATATATATATATATATATATATATATATATATATATATATA
VF_VS_25128	3450	1.05	DTR	not-determined	NA	20	7	0	0.5	TATATATATATATATATATA
VF_VS_25133	3449	1	DTR	not-determined	NA	23	2	0	0.695652	ACCCCAACCCCAACCCCAACCCC
VF_VS_25158	3448	1	ITR	not-determined	NA	20	1	0	0.6	CCCCAAAACCCCAAAACCCC
VF_VS_25264	3442	1.04	DTR	not-determined	NA	141	2	0	0.304965	AGGATCTAGAGCGATCTTTGCTGATTGTAGGCTGCACTTTACAAGGGCTGGCTGCGAAAGATTTGGTTCGCGTGGACCAACAGGAGAAAGTGAAGAGACATTGTCCAGCCCTGTATGACTTTGGAGCGTCTATCATGGAGA
VF_VS_25340	3438	1.04	DTR	not-determined	NA	141	2	0	0.390071	ATGTTATAAATAATCTAATTTGTCATGTAAATTGGAATCATTTCAAGCCATTTAGCTGTTTGGCCTTCTTCACAAACTTATCATACTACTGAATGAAATCATCCGCCTTTGCATTCTTCTGTCCTTTTCTCAAAATCTGAA
VF_VS_25410	3434	1.07	DTR	not-determined	NA	29	3	0	0.517241	ATATATATATATATATATATATATATATA
VF_VS_25543	3427	1.08	DTR	not-determined	NA	68	2	0	0.5	ACACACACACACACACACACACACACACACACACACACACACACACACACACACACACACACACACAC
VF_VS_25603	3424	1.03	DTR	not-determined	NA	24	6	0	0.5	TATATATATATATATATATATATA
VF_VS_25705	3418	1.18	ITR	not-determined	NA	141	1	0	0.304965	TGTCTCAAACACATCAGCCCTACGACGGCGAGTCATGGACACAATGGGCAGAGGTGGAACAGCGACTAGGCAACCCAGATCGCGCCGCTTTCAATGCACGCCGCGGCGCTGAGCTGCAGAGCGCGCGAGAATTGCGCAACA
VF_VS_25813	3412	1.04	ITR	not-determined	NA	141	1	0	0.29078	GCGAGACGCATCCCACTCACTAGCGATTTGAGGGTGTGTGGTTGCTAGGTCGTTGAACCCGGACAGGAACCTGACTTTTTTGCAGATTGGGCAGCCCGTCCCATTGCTAGTTCTATTAACTAAAGGTGCCGACCAGGAGTG
VF_VS_25925	3406	1.06	DTR	not-determined	NA	39	3	0	0.512821	ATATATATATATATATATATATATATATATATATATATA
VF_VS_25927	3406	1	ITR	not-determined	NA	20	1	0	0.6	CCCCAAAACCCCAAAACCCC
VF_VS_26128	3396	1.15	DTR	not-determined	NA	47	6	0	0.404255	TGCAACACACTGCAACACACTGCAACACACTGCAACACACTGCAACA
VF_VS_26542	3375	1.06	DTR	not-determined	NA	31	3	0	0.516129	ATATATATATATATATATATATATATATATA
VF_VS_26547	3375	1.04	DTR	low	AAI-based completeness < 80%	141	2	0	0.446809	TGTGAAGCCTCAATTAGTGGTACTTTAAATTGGAAACTATCTACCTTTGATTTTTTTGATTTACAAAGTTCTTGAATTTTATGTAATTCCATTTAATGTATAAATAAGTTTGTCGGTTGGTATTTTGAACATTTTTCCGAA
VF_VS_26595	3372	1.03	DTR	not-determined	NA	126	2	0	0.365079	GCAATGGCCGGGCGGCTGGCGGTCGCTCTGCTGGCACCTCTGGTGCCACCCACCATAGTCAGCGGGCCGCCATTACAGGAAGGCTGTGAAGGGATGCGAGGTGATGGCCCTGAAAGAGGCCATGAC
VF_VS_26632	3370	1.08	DTR	not-determined	NA	33	2	0	0.484848	ATATATATATATATATATATATATATATGTATA
VF_VS_26805	3362	1.04	DTR	not-determined	NA	141	2	0	0.312057	CTGCATACCTGTCCCTGAATAACTGGAATAACCTGTTAACAGCATAACCAGAATAAGCCGCTAAGCACTCAAAAGAGTCTCTTGTGTTTGCAGGTAAGGTAAGCGTGGTTACATGTGCAAATTCTGGACGGTCACCGCAAA
VF_VS_26808	3362	1.04	DTR	not-determined	NA	47	2	0	0.510638	ATATATATATATATATATATATATATATATATATATATATATATATA
VF_VS_26994	3353	1.04	DTR	not-determined	NA	141	2	0	0.297872	CCAGGTTTGTCAACAATGCAGCATGGGTACGATCCAAGTGTGTGTTCAGAGTTTGTGATCAATGAAAAGGCGGCCAGCAATTGAGTTTACAGGTGAATGTCAACAAAGCGTGTATTTACTTTACCAACAATAGCGCTGACC
VF_VS_27117	3347	1.05	DTR	not-determined	NA	23	3	0	0.521739	ATATATATATATATATATATATA
VF_VS_27207	3343	1.17	DTR	not-determined	NA	76	2	0	0.289474	AGGAATGTGCCCAACTCAGACTTAGGGTTTAGGATTTATAGTTCAAGGAATGTGCCCAACTCAGACTTAGGGTTTA
VF_VS_27460	3332	1.18	DTR	low	HMM-based completeness (upper-bound) < 80%	100	2	0	0.42	ATTAATTATGTAAATAATGAAATTGAATTATCGCCACAAATTGCTCGGTTTATTCATAGAATACAAAATAGAAATATAAATGGTTTAAGTGTTTACAATG
VF_VS_27813	3316	1.14	DTR	not-determined	NA	45	2	0	0.511111	ATATATATATATATATATATATATATATATATATATATATATATA
VF_VS_27886	3312	1.09	DTR	not-determined	NA	39	3	0	0.512821	ATATATATATATATATATATATATATATATATATATATA
VF_VS_27992	3307	1.03	DTR	low	AAI-based completeness < 80%	80	2	0	0.3125	TCGAATGTTGCAAATTTTGAGCGTAAACGTGTTTCAGAAAGTCACTGTCAATCAGCTACTTGGAGATTTTAGCACTACAA
VF_VS_28011	3306	1	ITR	not-determined	NA	20	1	0	0.6	CCCCAAAACCCCAAAACCCC
VF_VS_28161	3300	1.04	DTR	not-determined	NA	21	5	0	0.52381	ATATATATATATATATATATA
VF_VS_28358	3292	1.02	DTR	not-determined	NA	84	2	0	0.380952	CTCACACGACACACATTCCCATATATACGAATGTATCCGCATAGAAAACATATGAAACGGACACTCTGTTGGAACAGAGTGCAA
VF_VS_28386	3291	1.11	DTR	not-determined	NA	43	2	0	0.511628	ATATATATATATATATATATATATATATATATATATATATATA
VF_VS_28438	3289	1.11	ITR	not-determined	NA	109	2	0	0.504587	ATATATATATATATATATATATATATATATATATATATATATATATATATATATATATATATATATATATATATATATATATATATATATATATATATATATATATATA
VF_VS_28449	3288	2	ITR	low	Multiple genome copies detected	1000	1	0	0.271	ACAACTAACGGACGACCAAGGCCAGCCTTTTGCCGTGAACGAATCTAAGAACTGGACCGCTGTCATTCGGTTTGAAACAGCCGAGGAAAACAAGAATGCAACCACCCAAAATTTTCTACAGAACCAACAATTACGTTTTCTCGCTTCTCATAATTGTTCGAACTGAAAATAATAATGTTTTTTAAGTATATAAATATGTCCGTAGTACCAACACAGATGATACCCGGCGCTCTCGCTAACGGCGTCGACAGCTTGAAGGCGCTCACTCCTGAACGCATTAAGCTTAAACCAGTGAACCAGGCTCAGCAATATACTAAAAATGGAATTAATAAAATTTCTTTCCGACTACCATCTTACAGCAATAGCTTCCTTGACACGAGTAAATCGTTTTTGACTTAT…
VF_VS_28793	3273	1	ITR	not-determined	NA	20	1	0	0.6	CCCCAAAACCCCAAAACCCC
VF_VS_28920	3268	1.03	ITR	not-determined	NA	29	2	0	0.517241	TATATATATATATATATATATATATATAT
VF_VS_28999	3265	1.3	DTR	not-determined	NA	93	3	0	0.333333	AATTCGAATATTAAAACACTCCTTATTACCATACTACAATAGTAATGATTTGATTGTTTACCTCTTTGTCTAAAAAGCCGAGTCGCGAGGCCT
VF_VS_29130	3259	1.04	DTR	not-determined	NA	20	5	0	0.5	TATATATATATATATATATA
VF_VS_29224	3255	1.09	ITR	not-determined	NA	37	1	0	0.513514	TATATATATATATATATATATATATATATATATATAT
VF_VS_29281	3252	1.08	ITR	high	HMM-based completeness (lower-bound) > 90%	141	1	0	0.297872	ATCCATGTGCAACAAAGGATTAGGATCGTGATTGTCATATATAATGCCAGCCAATAATGGCTCAAATATGTCAAGTAATGCCTCTACTGTACTAACTGGAGTGTATACAGGCGTGTTCGGATCATATCCACCGCCTCCACC
VF_VS_29298	3252	1	ITR	not-determined	NA	23	1	0	0.521739	CCCCAAAACCCCAAAACCCCGTG
VF_VS_29348	3249	1.1	DTR	not-determined	NA	22	7	0	0.5	TATATATATATATATATATATA
VF_VS_29659	3237	1.06	DTR	not-determined	NA	25	4	0	0.52	ATATATATATATATATATATATATA
VF_VS_29884	3227	1	ITR	not-determined	NA	20	1	0	0.6	CCCCAAAACCCCAAAACCCC
VF_VS_29927	3225	1	ITR	not-determined	NA	22	1	0	0.545455	CCCCAAAACCCCAAAACCCCAA
VF_VS_30000	3222	1	ITR	not-determined	NA	20	1	0	0.6	CCCCAAAACCCCAAAACCCC
VF_VS_30264	3211	1.04	DTR	not-determined	NA	141	2	0	0.29078	GGCAATTCCTGTCAATGGTGTGCCGCTAACACCTATAAAACTGGTACTGGCATTAATAGCTGTTCTTCATGTCCTACCAACTCAGATGGACCATATGGGAGTAGCTCACAAGCAAACTGTGTTTGTAAAACGGGATTTACA
VF_VS_30295	3210	1.04	DTR	not-determined	NA	141	2	0	0.340426	GCCGTGCCCGAGAACGCGTTGCTGCCGATGAAGTCGAACGCATCGTTGGCGCCGGTCAGGGTGTTGGCGTCGATACCCGACAGGTCGATCAGGTCTTCGCCATGGACGAACCCGTTGATGAAATCGCGGTTGGCCTGGCCC
VF_VS_30393	3206	1.01	ITR	not-determined	NA	32	1	0	0.59375	CCCAAACCCCAAACCCCAAACCCCAAACCCCA
VF_VS_30469	3203	1.03	ITR	not-determined	NA	23	1	0	0.521739	TATATATATATATATATATGTGT
VF_VS_30493	3202	1	ITR	not-determined	NA	28	1	0	0.392857	GTTATGTTGAGTCCTCCGTTATGTGAAG
VF_VS_30630	3197	1.08	DTR	not-determined	NA	29	2	0	0.517241	ATATATATATATATATATATATATATATA
VF_VS_30654	3196	1.03	DTR	low	AAI-based completeness < 80%	104	2	0	0.442308	AAATTCAAATTCATTTAGGAACTCTTCATCTGTTGGTATTCCCCCAATCCCTTCCATTCCTTTTACTATGTCAATTACTTTTTCTGATATATTCATAATTTCTC
VF_VS_30663	3195	1	ITR	not-determined	NA	20	1	0	0.6	CCCCAAAACCCCAAAACCCC
VF_VS_30737	3193	1	ITR	not-determined	NA	20	1	0	0.6	CCCCAAAACCCCAAAACCCC
VF_VS_30809	3189	1.07	DTR	not-determined	NA	25	4	0	0.52	ATATATATATATATATATATATATA
VF_VS_30873	3186	1.04	DTR	not-determined	NA	141	2	0	0.304965	GAATCGCCGCGTGTTCCGCCATACTGCGCAAAGCCGATGATGGCCTCAACATCGGCGGAATTCTTCGAGGGGTCCAGCAGAACCAACGCATGGATGCGCCCGATGGAAAGCTCTACACCGGGGAACAGCACCAATGGCCTA
VF_VS_30978	3182	1.06	DTR	not-determined	NA	23	3	0	0.521739	ATATATATATATATATATATATA
VF_VS_31141	3174	1.04	DTR	not-determined	NA	47	3	0	0.510638	ATATATATATATATATATATATATATATATATATATATATATATATA
VF_VS_31292	3168	1.04	DTR	not-determined	NA	141	2	0	0.361702	CCAGCGTCGATTGCTGGGCAACGTCAGAAGGGGTCCACTTCGCTGCGTATGGCATCGGTGGGATGTATACAGCTGGCGTAGTGTAAGGCGAACCGAAGAACAGGGCTAAGGCGATGCAACGTCGAAGCCGTTGTGTTGCGG
VF_VS_31295	3168	1.03	DTR	not-determined	NA	28	2	0	0.5	TATATATATATATATATATATATATATA
VF_VS_31496	3160	1	ITR	not-determined	NA	23	1	0	0.521739	CCCCAAAACCCCAAAACCCCATA
VF_VS_31564	3157	1.02	DTR	low	AAI-based completeness < 80%	91	2	0	0.417582	CGTTTCTGTAAACTTTTTACAGTTTATAAAGTCCAATACGTGTTCGTATTGGGTTGTTGTAAGGTTTTTTGGTTGGGGATTAGCTAACAAC
VF_VS_31575	3157	1.04	DTR	not-determined	NA	141	2	0	0.375887	TGCAAAACATCCCCAATTAAATTATTATTATTATAATATATTGATGAACGCCGGACTTGATTCACCAGAATTTATAGACTTCTAGCCTAATCAATTATCGTAAATTCACCCATATAAATGCAAGAATTATGGTATCTTTAA
VF_VS_31681	3153	1.11	DTR	not-determined	NA	26	5	0	0.423077	GCAACACACTGCAACACACTGCAACA
VF_VS_31743	3150	1.1	DTR	not-determined	NA	35	5	0	0.514286	ATATATATATATATATATATATATATATATATATA
VF_VS_31962	3141	1.04	DTR	not-determined	NA	141	2	0	0.35461	CCACAATACTGTAGACACATCATTCGTACATTAATTTAATTGTAATGTTCAGGAGGCTGTACCATGCCACAGAGATAGTTAAGTACCTCCAACTTGAACTTGAGAACTATAAGAATACCTACAACATTTTCTAGAATGAGG
VF_VS_32206	3131	1.12	DTR	not-determined	NA	21	2	0	0.52381	ACATATATATATATATATATA
VF_VS_32321	3127	1.04	DTR	not-determined	NA	141	2	0	0.326241	AAACTCAGAAACAGCCTCTGCTGAGGCCTCTTTTACAGTCAAGGAACGCTCAGACTTGTTGAAGAAACTCGTACTTGATCCTTCAATGCATGCAGACATCAGGCCTCGCAGCAATAAAAAATTATCTGCCGATTCGAAAAC
VF_VS_32370	3125	1.14	DTR	not-determined	NA	25	2	0	0.52	CACACACACACACACACACACACAC
VF_VS_32428	3122	1.06	DTR	not-determined	NA	33	2	0	0.515152	ATATATATATATATATATATATATATATATATA
VF_VS_32456	3121	1.07	DTR	not-determined	NA	120	2	0	0.375	AACCCGATTCCGCGCCGGAGAAACCGGGCAAGAAGACGCCAGCGCGCTCAGGGAAGGTGCCCGCAGGAAAGACCGGGAAGTCTGTGGGAGGTGGCAAGGAGCCGGTTAGGAAACCAAGTC
VF_VS_32548	3117	1.13	DTR	not-determined	NA	33	5	0	0.515152	CACACACACACACACACACACACACACACACAC
VF_VS_32612	3115	1.17	DTR	not-determined	NA	39	3	0	0.512821	ATATATATATATATATATATATATATATATATATATATA
VF_VS_32723	3111	1.06	ITR	not-determined	NA	28	3	0	0.5	ACACACACACACACACACACACACACAC
VF_VS_32779	3109	1.04	DTR	not-determined	NA	58	2	0	0.5	TATATATATATATATATATATATATATATATACATATATATATATATATATATATATA
VF_VS_33085	3097	1.11	DTR	not-determined	NA	22	3	0	0.5	TATATATATATATATATATATA
VF_VS_33472	3083	1.09	DTR	not-determined	NA	28	2	0	0.5	TATATATATATATATATATATATATATA
VF_VS_33523	3081	1.15	DTR	not-determined	NA	22	5	0	0.5	TATATATATATATATATATATA
VF_VS_33532	3081	1	ITR	not-determined	NA	23	1	0	0.521739	CCCCAAAACCCCAAAACCCCTAA
VF_VS_33575	3079	1.04	DTR	not-determined	NA	141	2	0	0.312057	GAGCAGCGGCTGTCTTGACAAGGAGTAATAGAACTTGCTGTCGGCCTTGGTCCAATGCACCACGTAAAAAATCAAGACAACCACGGCAATCGTCCAATCGACAACATACACGATCTTGAGCACGTAGTCCTCGTAGGCAGA
VF_VS_33600	3078	1	ITR	not-determined	NA	20	1	0	0.6	CCCCAAAACCCCAAAACCCC
VF_VS_33623	3077	1.06	DTR	not-determined	NA	26	3	0	0.5	TATATATATATATATATATATATATA
VF_VS_33936	3066	1.08	DTR	not-determined	NA	46	3	0	0.5	ATATATATATATATATATATATATATATATATATATATATATATAT
VF_VS_33980	3065	1.07	DTR	not-determined	NA	71	2	0	0.507042	ATATATATATATATATATATATATATATATATATATATATATATATATATATATATATATATATATATATA
VF_VS_34058	3062	1	ITR	not-determined	NA	20	1	0	0.6	CCCCAAAACCCCAAAACCCC
VF_VS_34062	3062	1	ITR	not-determined	NA	22	1	0	0.545455	CCCCAAAACCCCAAAACCCCGT
VF_VS_34127	3060	1.06	DTR	not-determined	NA	49	3	0	0.408163	CAAGTGATAGCAAGTGATAGCAAGTGATAGCAAGTGATAGCAAGTGATA
VF_VS_34484	3046	1	ITR	not-determined	NA	20	1	0	0.6	CCCCAAAACCCCAAAACCCC
VF_VS_34529	3045	1.06	ITR	not-determined	NA	21	4	0	0.52381	TATATATATATATATATATAT
VF_VS_34569	3043	1	ITR	not-determined	NA	22	1	0	0.545455	CCCCAAAACCCCAAAACCCCAT
VF_VS_34590	3042	1.11	ITR	not-determined	NA	33	1	0	0.515152	TATATATATATATATATATATATATATATATAT
VF_VS_34747	3037	1	ITR	not-determined	NA	21	1	0	0.571429	CCCCAAAACCCCAAAACCCCT
VF_VS_34802	3035	1.01	ITR	not-determined	NA	31	1	0	0.516129	TATATATATATATATATATATATATATATAT
VF_VS_34908	3031	1.04	DTR	not-determined	NA	141	2	0	0.297872	GCCACTTTCTTCAAAGCAGATTTTGCAGCACCACACTCTTTGATTCCGTCATTGACCACTAGCTGAAGACAATGACTAAAGCATGGTAGGCGTAAGAATTCATCTTCAGATGGTGGAACGATTGTTGCTTGATAAACATTA
VF_VS_34947	3030	1.04	DTR	not-determined	NA	141	2	0	0.333333	CGCGCTGGGGTTGTCACGGATGAGGACCTGGAGGCGTCTGAACCCTTTCGGATAGATCTGGACGAACCGACGGTTCTCCCGTGCCAAGTCGCTGCGACGGTCGTCATCCCGGTCCTGCCGCGCGCGTCTGATCTCGGTCGC
VF_VS_34997	3028	1.06	DTR	not-determined	NA	23	2	0	0.521739	ATATATATATATATATATATATA
VF_VS_35010	3028	1.02	DTR	not-determined	NA	27	2	0	0.592593	ATCCCCAATCCCCAATCCCCAATCCCC
VF_VS_35034	3027	1.02	DTR	not-determined	NA	82	2	0	0.329268	AGTTGAAGTGAATTGTGCGATCGGCGCAGCTATCCCGTAGGGAATCGGTTTTGTCGATCGATTGTACAGGCCCGATGGTTGA
VF_VS_35111	3025	1.14	ITR	not-determined	NA	55	2	0	0.509091	TATATATATATATATATATATATATATATATATATATATATATATATATATATAT
VF_VS_35195	3022	1.05	ITR	not-determined	NA	57	1	0	0.508772	TATATATATATATATATATATATATATATATATATATATATATATATATATATATAT
VF_VS_35371	3015	1.04	DTR	not-determined	NA	21	6	0	0.52381	CACACACACACACACACACAC
VF_VS_35469	3011	1.04	DTR	not-determined	NA	68	2	0	0.352941	ATTGTTGTCAGGAACGTGCCTCGACTTTGAATATCTTATTGTCTCAGGATGCACTGAATTGGGAGTTA
VF_VS_35536	3009	1.03	DTR	not-determined	NA	119	2	0	0.260504	CTAGTACAGATACCCGTGATGCGCTATCTGGTGGTGTGGCCTTAACTACTGTGAACCAAGTACTTAGTGGTCTACAACCAGGCGATCGGGTCTGCCAAACAATTATCGCTAATCCTGGC
VF_VS_35586	3007	1.04	DTR	not-determined	NA	69	2	0	0.507246	AGAGAGAGAGAGAGAGAGAGAGAGAGAGAGAGAGAGAGAGAGAGAGAGAGAGAGAGAGAGAGAGAGAGA
VF_VS_35603	3007	1	ITR	low	HMM-based completeness (upper-bound) < 80%	20	1	0	0.6	CCCCAAAACCCCAAAACCCC
VF_VS_35606	3007	1.04	DTR	not-determined	NA	141	2	0	0.340426	AAAAAGGCTGATGGCGTCGATGGCGGATTCTACCAGGTAGACCGTTGCCGCCCTGGTGATGTCTCCGACACGGAATCCGCCGCCGTCCTTTCGGCTCCCTGGCGCCATGCCGGTGAAGCGAGTGCCATCGGGACGGGGCAG
VF_VS_35619	3006	1.04	ITR	not-determined	NA	31	3	0	0.516129	TATATATATATATATATATATATATATATAT
VF_VS_35867	2995	1.12	ITR	not-determined	NA	52	1	0	0.5	TGTGTGTGTGTGTGTGTGTGTGTGTGTGTGTGTGTGTGTGTGTGTGTGTGTG
VF_VS_36013	2984	1.04	DTR	not-determined	NA	141	2	0	0.347518	ATCAGCAAAAATACCAAAGTCATCCCCCACATCAGTCGTGTACCGAAGCCATTTTAGAGAACCTGCCATAATCTCGAAACTCCTATTTTCATGAAATTGAACAACTTAGCCACATACTAGCAGACGACTGTTAGTAGCGAT
VF_VS_36016	2984	1.04	DTR	not-determined	NA	141	2	0	0.312057	CAGGCCATGGCGGAGGACTAGCCCCGCCTACCGTATCCCCTAAGCTCCATGAATCTATGGACACTTGGAATACAGTCCCGAATATGAATTTGAACCGGATTAAATCGAATGGGTGAACGAAAGTATTAAGGAAACGATTGC
VF_VS_36100	2977	1	ITR	not-determined	NA	21	1	0	0.571429	CCCCAAAACCCCAAAACCCCT
VF_VS_36411	2953	1.12	DTR	not-determined	NA	38	3	0	0.5	ATATATATATATATATATATATATATATATATATATAT
VF_VS_36421	2952	1.23	DTR	not-determined	NA	141	2	0	0.404255	GAGCAAGAAACAACACCCACGAGCACATAAGGATAAAAACGCAACGAATCCTTAAAAGCCACGCACGCGCTGCACGATGTAACCAAGACCAAGACGCCCGCCGTGCCGCCGCCCGCCGCCACACACCACGCCCGCCGCGCC
VF_VS_36452	2950	1.05	ITR	not-determined	NA	141	1	0	0.347518	TATCAAGATGATGTATTGAATCTGTCGGAGTAGTTACATCACAGCGAACGGTTCGCCCAGAAGCCAAAACTAGAAATTTCTCAATGGCACTACCAGTGCACACACAGGCCTGAGCACACAAAGCTGCTCACACACAAACAC
VF_VS_36475	2949	1.13	ITR	not-determined	NA	27	2	0	0.518519	TATATATATATATATATATATATATAT
VF_VS_36747	2928	1.05	ITR	not-determined	NA	46	1	0	0.5	AGAGAGAGAGAGAGAGAGAGAGAGAGAGAGAGAGAGAGAGAGAGAG
VF_VS_36753	2927	1	ITR	not-determined	NA	23	1	0	0.608696	CCAAACCCCAAACCCCAAACCCC
VF_VS_36838	2920	1.07	DTR	not-determined	NA	23	3	0	0.521739	ATATATATATATATATATATATA
VF_VS_36923	2913	1.05	DTR	not-determined	NA	141	2	0	0.397163	AATCGTTACTACCCTCAAAGAATCTCTAAATCTTAAAGGCAATGCAACCAGTAAAATTAAAGTTGAAATTAGTAAAGTTTTGGCAATGTTAGAGAATCTTTAACAACTCAATGTATACTTAAATTAATACGCTCTGTAGGA
VF_VS_36981	2910	1.02	DTR	not-determined	NA	20	2	0	0.5	TATATATATATATATATATA
VF_VS_37206	2893	1.07	DTR	not-determined	NA	33	3	0	0.515152	ATATATATATATATATATATATATATATATATA
VF_VS_37262	2890	1.11	DTR	not-determined	NA	36	2	0	0.5	ACACACACACACACACACACACACACACACACACAC
VF_VS_37281	2888	1.06	DTR	not-determined	NA	28	2	0	0.5	TATATATACATATATATATATATATATA
VF_VS_37532	2871	1.09	DTR	not-determined	NA	85	2	0	0.505882	ATATATATATATATATATATATATATATATATATATATATATATATATATATATATATATATATATATATATATATATATATATA
VF_VS_37788	2853	1.15	DTR	low	Repetetive TR sequence	25	9	0	0.52	ATATATATATATATATATATATATA
VF_VS_38018	2840	1.12	DTR	not-determined	NA	47	2	0	0.510638	ATATATATATATATATATATATATATATATATATATATATATATATA
VF_VS_38155	2831	1.14	DTR	not-determined	NA	65	2	0	0.507692	ATATATATATATATATATATATATATATATATATATATATATATATATATATATATATATATATA
VF_VS_38239	2825	1.15	ITR	not-determined	NA	21	2	0	0.52381	TATATATATATATATATATAT
VF_VS_38576	2805	1.05	DTR	not-determined	NA	49	2	0	0.510204	ATATATATATATATATATATATATATATATATATATATATATATATATA
VF_VS_38702	2797	1.13	ITR	not-determined	NA	29	3	0	0.517241	TATATATATATATATATATATATATATAT
VF_VS_38820	2790	1.05	DTR	not-determined	NA	64	2	0	0.5	TATATATATATATATATATATATATATATATATATATATATATATATATATATATATATATATA
VF_VS_38829	2789	1	DTR	not-determined	NA	20	2	0	0.5	TATATATATATATATATATA
VF_VS_38831	2789	1.14	DTR	not-determined	NA	21	4	0	0.52381	ATATATATATATATATATATA
VF_VS_39147	2770	1.04	DTR	not-determined	NA	31	3	0	0.516129	ATATATATATATATATATATATATATATATA
VF_VS_39366	2757	1.06	DTR	not-determined	NA	141	2	0	0.297872	ACGCGGGGACATGACTCTCATGAGCGTCATGTAGGCGATGCATACACACAAGACAACTTGAAGTGCATGACTGATTCATATGAGAGTTCGTGGCTCATTCATGTGTGGAGACACATGCACACATACACATACACGTGGGGA
VF_VS_39384	2756	1.08	DTR	not-determined	NA	34	4	0	0.5	ATATATATATATATATATATATATATATATATAT
VF_VS_39558	2746	1.18	ITR	not-determined	NA	58	1	0	0.5	TGTGTGTGTGTGTGTGTGTGTGTGTGTGTGTGTGTGTGTGTGTGTGTGTGTGTGTGTG
VF_VS_39617	2743	1.03	DTR	low	AAI-based completeness < 80%	112	2	0	0.276786	CCCGGTAACTTTCGCGGAAGATGTTTATCATCTTGGCGCTGTTGAAGTCGCCGGATACCTCGCGCCGACAGATGTCAAGGAAGTCACTGTCCTTCGCGACCGGGATCGTAAC
VF_VS_39835	2730	1.02	ITR	not-determined	NA	79	1	0	0.278481	CCGCTGGGTCTAAAGTAGTAGTCCTCGTAAAACCGAAATCCAGACTTCTGATTCTAGTCCAAAGTGATGGGGTATGTGA
VF_VS_39874	2728	1.05	DTR	not-determined	NA	141	2	0	0.425532	AAACAAAATACCCTTAGATATATCAATAGATAGTCTAAAAATTAGAATTCCATTTGAACTTATTAAAGTATTAAATCCAAGTTTATTAGGTAAATGGATATTGCTAAATGAAGACACTGGAGAAGTAGACCCGAAAGTGTT
VF_VS_39922	2726	1.01	DTR	not-determined	NA	23	2	0	0.521739	ATATATATATATATATATATATA
VF_VS_40585	2690	1.06	DTR	not-determined	NA	26	5	0	0.5	TATATATATATATATATATATATATA
VF_VS_40625	2689	1.05	DTR	not-determined	NA	141	2	0	0.304965	CAATCTCATCTTTCACCTTCAACTTGTGCCCATCAAGCTTGGGCGATACAAGAGAAGAGAGAGGAGAGAGAGGATTGAGAGGAGGAGCGGCATGACCCCAGCGTTGGTCGTGGCGTTGGTCATGGCATTGCTCCTCGCCAA
VF_VS_40673	2687	1.03	DTR	not-determined	NA	22	4	0	0.5	ATATATATATATATATATATAT
VF_VS_40983	2672	1.05	DTR	not-determined	NA	141	2	0	0.340426	AACTACACACGGATACATACATGCGCACATTCACAGAAGTTCCAATCAGTGTTTGTTTTGAACTGTCAGAACTCAGGCAAGTGAACAAGGCCGAGGTCATGGAGGCAAACCAAAACCTGGTACTAATTGTATTTCAACAGG
VF_VS_41160	2662	1.47	DTR	low	Repetetive TR sequence	26	41	0	0.384615	GTTGTGGTTTGATTAAAGATTGGAAA
VF_VS_41291	2656	1.03	DTR	not-determined	NA	30	2	0	0.4	CACACTGCAACACACTGCAACACACTGCAA
VF_VS_41374	2651	1.04	ITR	not-determined	NA	27	3	0	0.518519	ATATATATATATATATATATATATATA
VF_VS_41492	2645	1.07	ITR	not-determined	NA	31	1	0	0.516129	TATATATATATATATATATATATATATATAT
VF_VS_41838	2628	1.05	ITR	not-determined	NA	43	1	0	0.511628	TATATATATATATATATATATATATATATATATATATATATAT
VF_VS_41986	2620	1.06	DTR	not-determined	NA	26	2	0	0.5	CACACACACACACACACACACACACA
VF_VS_42106	2614	1	ITR	not-determined	NA	23	1	0	0.565217	CCCCAAAACCCCAAAACCCCTCA
VF_VS_42159	2612	1	ITR	not-determined	NA	21	1	0	0.571429	CCCCAAAACCCCAAAACCCCA
VF_VS_42255	2607	1.09	DTR	not-determined	NA	24	4	0	0.5	TATATATATATATATATATATATA
VF_VS_42443	2598	1.05	DTR	not-determined	NA	141	2	0	0.361702	GGATGCCCAAACACATCATCACCATCAGTTTCTGAGCCCTTACGCCAACTCCCAACGACACCCAATTGTTCAAAAACCCACACGAAATGGACATTCAACAACACCCAACGAATGCCCTGAATGCCCAAAACACATCATCAC
VF_VS_42510	2596	1.06	ITR	not-determined	NA	20	1	0	0.6	CCCCAAAACCCCAAAACCCC
VF_VS_42556	2594	1.05	ITR	not-determined	NA	23	4	0	0.521739	TATATATATATATATATATATAT
VF_VS_42594	2592	1.07	DTR	not-determined	NA	25	4	0	0.52	ATATATATATATATATATATATATA
VF_VS_42609	2591	1.06	DTR	not-determined	NA	28	4	0	0.5	CACACACACACACACACACACACACACA
VF_VS_42726	2586	1.16	DTR	not-determined	NA	25	4	0	0.52	ACACACACACACACACACACACACA
VF_VS_43113	2569	1.1	DTR	not-determined	NA	52	3	0	0.5	CACACACACACACACACACACACACACACACACACACACACACACACACACA
VF_VS_43179	2566	1.06	ITR	not-determined	NA	27	1	0	0.518519	TATATATATATATATATATATATATAT
VF_VS_43393	2556	1.09	ITR	not-determined	NA	21	3	0	0.52381	TATATATATATATATATATAT
VF_VS_43611	2547	1.04	ITR	not-determined	NA	29	1	0	0.482759	TATATATATATATATATATATATATATAC
VF_VS_43814	2538	1.08	DTR	not-determined	NA	35	4	0	0.514286	ATATATATATATATATATATATATATATATATATA
VF_VS_43902	2534	1.05	DTR	not-determined	NA	141	2	0	0.297872	GATCGCGAGGTCAGGTTGTGTGGAGTGCGTTGTAGTTAGTCGCGAGGCAGACTCCGCAGCTCCTTTCCTTCATATTCCCACTTCTTGCCAATGCTTCCTACGGGAGCCATGCGGCGTTAGGAGATAACCATGGAGGGCACA
VF_VS_43954	2531	1.07	ITR	not-determined	NA	68	1	0	0.5	CACACACACACACACACACACACACACACACACACACACACACACACACACACACACACACACACACA
VF_VS_44064	2526	1.05	DTR	not-determined	NA	40	2	0	0.5	CACACACACACACACACACACACACACACACACACACACA
VF_VS_44073	2526	1.05	DTR	not-determined	NA	33	3	0	0.515152	ATATATATATATATATATATATATATATATATA
VF_VS_44096	2525	1.05	DTR	not-determined	NA	141	2	0	0.326241	AACGTTGTGTGTAATGCTTTCTAGAACGAGTAGACATCTTATGAAAGGACTAATATTTTACATTTTGACAATTTGTACGTTGACAGCTTATGGACAAGCCAAGGACGAAAAGATCTTGTATGTCGTAGACTCAATAGCTAT
VF_VS_44224	2520	1.13	ITR	not-determined	NA	43	2	0	0.511628	ATATATATATATATATATATATATATATATATATATATATATA
VF_VS_44291	2517	1.04	DTR	not-determined	NA	30	2	0	0.5	TATATATATATATATATATATATATATATA
VF_VS_44479	2509	1.09	DTR	not-determined	NA	25	3	0	0.52	ATATATATATATATATATATATATA
VF_VS_44669	2501	1.1	DTR	not-determined	NA	33	5	0	0.515152	ACACACACACACACACACACACACACACACACA
VF_VS_44905	2492	1.04	DTR	not-determined	NA	119	2	0	0.294118	CCTGAGCCCCCCGTTTGCGTTACCGTTACGTCCCACTTAATATCTGAGGCTACACTGGGGGCGGTGAATGTGGTTAACCCTATACTTACGTTATCTCCGTTACACTGTGTGGCAGGTGA
VF_VS_45003	2488	1.04	DTR	not-determined	NA	120	2	0	0.283333	ATTGCCTTATGCGATTGTGCTGGGCACACTGATTGACAAGCAGGCGTGACGACTTACGGACAGCGAAAGGCTCCCATCGCGATGACCCACCGATTTTCTATCCCCTTGGCGGCGGAAGCG
VF_VS_45117	2483	1.11	DTR	not-determined	NA	26	3	0	0.5	TATATATATATATATATATATATATA
VF_VS_45214	2480	1	ITR	not-determined	NA	20	1	0	0.6	CCCCAAAACCCCAAAACCCC
VF_VS_45232	2479	1.05	ITR	not-determined	NA	141	1	0	0.361702	TTATCGCTCTTGTTTATCTAAGTAAGTTGAACTATAACCTCGTTATGATATACTTGACACCTGTATCTCGGAAATCTAACTACTCTTTCATTTCAAATGCGTTTCTCAATGCTCGTGCATCCTGAAAACCGTCATGTAGCA
VF_VS_45255	2478	1.05	DTR	not-determined	NA	141	2	0	0.319149	CGGAAACCCTGCTTCAGTGCTGGCAACCAACTTTGCAATCCAAGTCCTGCCTGCTATTAGCGCTTGGCAACCTGCCGACTTGGTTACAATCCGCATTCGCGCGCGCAACCTGTTTTCATTGTCCGACGATTTCACGCTTGA
VF_VS_45479	2469	1.05	DTR	not-determined	NA	141	2	0	0.333333	CAAGTGCATCATCTAAACTTGGTAACGGGTTTAAGCTATAATCGGGTTTAGCTTCAATACCTGTTAACAGGTTCTCATATATCCTTGCTTTGTCGTGGTCATCCTTGAGTAACTGGTCATAATGCTCTAATGCACCAGCGA
VF_VS_45573	2465	1.02	DTR	not-determined	NA	59	2	0	0.525424	AAAAAGAAAAGAAAGATTTAATGAGTAGGTTAAAGCATGAAATACAACCTTATCCAAAG
VF_VS_45812	2456	1	ITR	not-determined	NA	20	1	0	0.6	CCCCAAAACCCCAAAACCCC
VF_VS_45867	2454	1.03	DTR	not-determined	NA	22	2	0	0.5	TATATATATATATATATATATA
VF_VS_46358	2435	1.05	DTR	not-determined	NA	141	2	0	0.326241	GAGCCATAACACTTAACAATGATGCGATCCGGCAATGGGTTTACGTTCTCAAACTCAGCAATTTTGTTCTCTACAGAGATAGGAATCAGGGATAGAGCCAAGCCAAGGTTTACGAATGTCTGCAAAACGCCCTCATACATA
VF_VS_46419	2433	1.06	DTR	not-determined	NA	28	3	0	0.5	AGAGAGAGAGAGAGAGAGAGAGAGAGAG
VF_VS_46499	2430	1.04	DTR	not-determined	NA	32	2	0	0.5	CACACACACACACACACACACACACACACACA
VF_VS_46566	2428	1.06	DTR	not-determined	NA	141	2	0	0.283688	AGTGGTCTGACTTATGGCGCGACTCAATGCAGCTCGACTATCAACCAGTAGTTCATGTTCGCAAGGTTCAACCAAAGAAACTAGATGACCCTCATCAAGGTTTACGTGATGCTGTCTGTGAAACTCTCAAGTATCAGGTTA
VF_VS_46584	2427	1.1	DTR	not-determined	NA	22	7	0	0.5	ATATATATATATATATATATAT
VF_VS_46919	2415	1.01	DTR	not-determined	NA	48	2	0	0.291667	GTCCAGAGTGGTGAAAAGCACCATTCCCACTCGGCATAGTTCAGGCCA
VF_VS_47008	2411	1.05	DTR	not-determined	NA	141	2	0	0.368794	AACAAAATATCAGATTCCTCCCTTGCTCTTAACATAGTTAACAAAGTCTGGTGAACTGACTAGGATATGTGCAACATCTAAACGTTCGTGCATCATGTGAAATGATAGATACCTCGGAATATACTGAAATTATAAACATTA
VF_VS_47038	2410	1.11	DTR	not-determined	NA	37	3	0	0.513514	CACACACACACACACACACACACACACACACACACAC
VF_VS_47086	2409	1.05	DTR	not-determined	NA	141	2	0	0.340426	ACTGCGGTGACTTCACCGGATGGGCAGTTCAACGACGCTGACGAGTTCGGTGTCACCCGTGATGCTGCTGATCCCACCGGTGCGGTCACCGCTAATGGCCCGCGCTATGGGTGGTTGGGTGCTAAGCAGCGTGCCGCCGAC
VF_VS_47536	2391	1.06	ITR	not-determined	NA	31	3	0	0.516129	TATATATATATATATATATATATATATATAT
VF_VS_47554	2391	1.17	DTR	not-determined	NA	89	2	0	0.505618	ATATATATATATATATATATATATATATATATATATATATATATATATATATATATATATATATATATATATATATATATATATATATA
VF_VS_47595	2389	1.07	DTR	not-determined	NA	45	3	0	0.511111	ATATATATATATATATATATATATATATATATATATATATATATA
VF_VS_47691	2386	1.05	ITR	not-determined	NA	141	1	0	0.297872	GTTTTAAGGGGTTCGCGCCGTCCGTTGACGGTGTCGGAGGTTGCCTCCTATTTGCAGATGTTTATGGCTCGTCAGACTGTGGATAATCGGCTGAAGAAACTCAACAAAAATAAACTTGTTGTTGAGACCGATGACGGTTGG
VF_VS_47854	2380	1.08	DTR	not-determined	NA	29	3	0	0.517241	ATATATATATATATATATATATATATATA
VF_VS_47914	2378	1.07	ITR	not-determined	NA	27	2	0	0.518519	TATATATATATATATATATATATATAT
VF_VS_48029	2374	1.07	DTR	not-determined	NA	20	8	0	0.5	CACACACACACACACACACA
VF_VS_48403	2361	1.12	ITR	not-determined	NA	141	1	0	0.340426	GCCTGCATGCTCATTGTGCTTGTCGAGTGTGCAGAGAGAGCGAGCGTGCGAGCAGGAGAAAACGCGAGAGGCGCCGAGCAAGCCCGAGAGCGAGCGTGTGCACTCAATGTGGCACTTACATGTATGCACCAAATTACCGGG
VF_VS_48600	2354	1	ITR	not-determined	NA	21	1	0	0.571429	CCCCAAAACCCCAAAACCCCA
VF_VS_48664	2352	1.06	DTR	not-determined	NA	91	2	0	0.318681	CGGTTGAGGACATAACACCGAGACATGTCATCTTGTGTCGACATGGTCCTCAAGCGATCAAGACGTGACACCTCAACACAAGATGAGACAC
VF_VS_48679	2352	1.1	DTR	not-determined	NA	25	2	0	0.52	ATATATATATATATATATATATATA
VF_VS_48780	2349	1	ITR	not-determined	NA	20	1	0	0.6	CCCCAAAACCCCAAAACCCC
VF_VS_48848	2347	1.19	DTR	not-determined	NA	25	2	0	0.52	ATATATATATATATATATATATATA
VF_VS_49313	2332	1.07	ITR	not-determined	NA	33	1	0	0.515152	TGTGTGTGTGTGTGTGTGTGTGTGTGTGTGTGT
VF_VS_49615	2323	1.02	ITR	not-determined	NA	38	1	0	0.605263	CCCAAACCCCAAACCCCAAACCCCAAACCCCAAACCCC
VF_VS_49618	2323	1.06	DTR	not-determined	NA	141	2	0	0.347518	AGTTCAGCAGCAAATTCTTCTTGGAGTTTTTGTAAAGTTGCTAGGTCTTCTTTCCCGACTTTATCAGCTAGACCTTCAGAGATTAGTTCGTTGATTTTGTCTAAGCAAGCATTTAAGCCAGCAGCAAATTCGTAACGACTA
VF_VS_49630	2322	1.06	DTR	low	AAI-based completeness < 80%	141	2	0	0.340426	AGCAATACATGAGAGTTGCCATAACTACATCCACATGAGCAAAAGCGAAAGTTAAGAACGTCGGGAGCTGGATGCACAGAAATGGGCACGTCCAGATCTAACAGAGAGGGGCGAGGTGTAATAACCTCCCTCGACTCTACT
VF_VS_49728	2319	1.08	DTR	not-determined	NA	35	2	0	0.514286	ATATATATATATATATATATATATATATATATATA
VF_VS_50218	2304	1.06	DTR	low	AAI-based completeness < 80%	141	2	0	0.319149	CGGTGATGTCGGCGGCTTCGGCCTTGGGGATGTTGCTGGTCATCATCAGGCCAGCGGGGACTGCCACGCAGGCGAGAAGCAAACCAATCTTGGAAGGTCTCATGGCGTCCTCTGGTTTCTGAGGACATCCCAATAGTCCTC
VF_VS_50322	2301	1.06	DTR	not-determined	NA	141	2	0	0.304965	CAGCATTGCCGTTGTAGTTTACCGTAGAGGTGGTGCCGAAGCTGTAAGTATTGAATATCGGGAATGAGCCTGCCTGTAATGCCCCCGTAGTGATTGTGTTATTTGTCATCGTAAACGTGGCTCCGTTGCTAATCGTAAACG
VF_VS_50424	2299	1.05	DTR	not-determined	NA	33	4	0	0.515152	CACACACACACACACACACACACACACACACAC
VF_VS_50609	2293	1.04	DTR	not-determined	NA	30	3	0	0.5	TATATATATATATATATATATATATATATA
VF_VS_50894	2284	1.08	DTR	not-determined	NA	20	4	0	0.5	CACACACACACACACACACA
VF_VS_50995	2281	1.14	ITR	not-determined	NA	141	1	0	0.35461	GCAGGCTGCTGCCGAAGCTAAGAGACAGACCTATGCCCAGAGAAAAGAGCACGAACGTTCGATGGTGCAACAGTCTTCAGACAGAGAGAGACAATTGAAAGAGAGTAATCTTCATAGAGCAATGAAGTACCTTGATACGTT
VF_VS_51278	2272	1.06	DTR	not-determined	NA	141	2	0	0.297872	AAACTCGTTTGCCACTGTATCACAAGTGAAGTCATCGCCAACGTGGAATCGACGACCTTCCGTGCGGGAGTGGCAATCGGCGAACCCCTCCCGAATCAGGTGGCGGCGGTCTGTATCAAACGATCGCCCCTGAAGGGCCAG
VF_VS_51361	2270	1	ITR	not-determined	NA	20	1	0	0.6	CCCCAAAACCCCAAAACCCC
VF_VS_51504	2266	1	DTR	not-determined	NA	22	2	0	0.363636	GACCATCAATCCCAATGGCGCA
VF_VS_51539	2265	1.08	DTR	not-determined	NA	55	2	0	0.509091	ATATATATATATATATATATATATATATATATATATATATATATATATATATATA
VF_VS_51658	2262	1.2	ITR	not-determined	NA	27	3	0	0.518519	TATATATATATATATATATATATATAT
VF_VS_51749	2259	1	ITR	not-determined	NA	21	1	0	0.571429	CCCCAAAACCCCAAAACCCCA
VF_VS_51817	2257	1.06	DTR	not-determined	NA	141	2	0	0.283688	CTTCATGTACTTGGGGTTGCAACATTGACCCCTTACCTGCCTCAAGGACTCTTTTTGCTATGGACGGCAGGGTTGTTCGGGACGCTGCTTGCTCCGTTGCAGACGCAACGTCGAAGAGTCTGTTGCGTTGCAGGACGCAAC
VF_VS_51917	2254	1.16	DTR	not-determined	NA	23	2	0	0.521739	ATATATATATATATATATATATA
VF_VS_51970	2252	1.01	ITR	not-determined	NA	32	1	0	0.625	CCCCAAACCCCAAACCCCAAACCCCAAACCCC
VF_VS_52213	2245	1.05	DTR	not-determined	NA	38	3	0	0.5	CATCCATCCATCCATCCATCCATCCATCCATCCATCCA
VF_VS_52361	2241	1.11	ITR	not-determined	NA	27	1	0	0.518519	TGTGTGTGTGTGTGTGTGTGTGTGTGT
VF_VS_52488	2237	1.11	DTR	not-determined	NA	52	3	0	0.5	ATATATATATATATATATATATATATATATATATATATATATATATATATAT
VF_VS_52657	2232	1.13	DTR	not-determined	NA	65	2	0	0.507692	ACACACACACACACACACACACACACACACACACACACACACACACACACACACACACACACACA
VF_VS_52962	2224	1	ITR	not-determined	NA	22	1	0	0.545455	CCCCAAAACCCCAAAACCCCAT
VF_VS_53137	2219	1.07	DTR	not-determined	NA	141	2	0	0.283688	GATACACCGCTGCGTGCGCTAGACGCACTTCTATCCCGAGATTCATATGACACACCCGGTTATCCTCACGACTTGCGCATGTCGTTGATGCTGTCCGATATCTTTATGATCAGGCTGCGAACAAAGGCTCTTGACGGGCAA
VF_VS_53155	2218	1.06	DTR	not-determined	NA	31	3	0	0.516129	ATATATATATATATATATATATATATATATA
VF_VS_53335	2213	1.1	DTR	not-determined	NA	53	2	0	0.509434	ATATATATATATATATATATATATATATATATATATATATATATATATATATA
VF_VS_53337	2213	1.04	DTR	not-determined	NA	21	2	0	0.52381	ATATATATATATATATATATA
VF_VS_53580	2207	1	ITR	not-determined	NA	23	1	0	0.521739	CCCCAAAACCCCAAAACCCCATA
VF_VS_53641	2205	1.19	DTR	not-determined	NA	141	2	0	0.404255	ATCTGCGTCGTGGTCAGGCTCCCGAGCTGGGTGCTGGTGAGCGCGCCGAGCTGGGTCGTCGTGAGAGCGCCGATCTCGGTCGTCGTCAAGCCGCCGAGCTGCGTCGTCGTCAGGGCGGCAAGCTGGGTCGTGGTCACCGCG
VF_VS_53671	2205	1.08	ITR	not-determined	NA	91	2	0	0.505495	ATATATATATATATATATATATATATATATATATATATATATATATATATATATATATATATATATATATATATATATATATATATATATA
VF_VS_53741	2202	1.08	DTR	not-determined	NA	39	2	0	0.512821	CACACACACACACACACACACACACACACACACACACAC
VF_VS_54002	2195	1.11	DTR	not-determined	NA	35	4	0	0.428571	CACACTGCAACACACTGCAACACACTGCAACACAC
VF_VS_54003	2195	1.11	DTR	not-determined	NA	22	3	0	0.5	TATATATATATATATATATATA
VF_VS_54055	2193	1.01	ITR	not-determined	NA	36	1	0	0.555556	CCCCAAAACCCCAAAACCCCAAAACCCCAAAACCCC
VF_VS_54253	2188	1	ITR	not-determined	NA	20	1	0	0.6	CCCCAAAACCCCAAAACCCC
VF_VS_54346	2185	1.22	DTR	not-determined	NA	141	2	0	0.361702	ACTATGTCTCGACTATATGAAGGAGTCATGTCCCTATGATGTCTTGTATATGAATGAGTCATGTCTCTACTATATGAATGAGTCACGGCACGTATATGAATGAGACATATTTCTATTGTGTCTTTGTATGTGAATGAGTCA
VF_VS_54395	2184	1.05	DTR	not-determined	NA	27	4	0	0.518519	ATATATATATATATATATATATATATA
VF_VS_54504	2180	1.11	DTR	not-determined	NA	21	3	0	0.47619	ATATATATATGTATATATATA
VF_VS_54575	2179	1.06	DTR	not-determined	NA	31	2	0	0.516129	ATATATATATATATATATATATATATATATA
VF_VS_54881	2170	1.06	DTR	not-determined	NA	48	2	0	0.5	TATATATATATATATATATATATATATATATATATATATATATATATA
VF_VS_55113	2164	1.17	DTR	not-determined	NA	28	3	0	0.5	CACACACACACACACACACACACACACA
VF_VS_55228	2161	1	ITR	not-determined	NA	20	1	0	0.6	CCCCAAAACCCCAAAACCCC
VF_VS_55355	2158	1.08	DTR	not-determined	NA	20	6	0	0.5	TATATATATATATATATATA
VF_VS_55387	2157	1.06	ITR	not-determined	NA	21	4	0	0.52381	TATATATATATATATATATAT
VF_VS_55391	2157	1.06	DTR	not-determined	NA	141	2	0	0.29078	GTCTGGCTATGGCGTATTCGTTCATGACATGGAAGGGGAGCCGAACATCGCAAACCTTGGAGGGTATGCATCCATCGACGAAGCCATCGAAGCGGGTCACCGCTGGTCCGAGTCGAGCTTTCATAAAGTCGTTCACGTAAC
VF_VS_55613	2151	1.05	DTR	not-determined	NA	21	7	0	0.52381	ACACACACACACACACACACA
VF_VS_55724	2149	1.06	DTR	not-determined	NA	20	2	0	0.5	TATATATATATATATATATA
VF_VS_55769	2148	1.08	DTR	not-determined	NA	141	2	0	0.297872	AACACAAGCCTATCTAACCTAACTGCTGTAGCTATTAACACTAGTTTACTTACAGGTGCAAGCACCATTGACTTGGGTTCAGATGCTAATGCCTTTAGGACTCTCTACCTAAGTGGAACTAGTATCTTTGAAGGTGCAACA
VF_VS_56050	2141	1.06	DTR	not-determined	NA	141	2	0	0.297872	CGGCAAGTCCAGAATACATTTATTAACAGGAAATGCTTTGAATTCAATTGCCAATGCTCCTAGCGAAGATGGCGAGCGGTCAAATTGCTGGCTGGAGCCATGCAACCAAGATCAAGTTCCTAGTTTAGACTTGTTACATGC
VF_VS_56220	2136	1.07	ITR	low	HMM-based completeness (upper-bound) < 80%	141	1	0	0.35461	ATCGCGACATACATGCTGCTCGCAACATTCTTCTCCGTTTCATTGACTAGTTACTGTCTACATTTCCGGTTTCGTTATCCCGGACAATATGAATCCACTCATCTTTGATTTAATTAGACACGTCCGTGGTATGTGGATGTC
VF_VS_56349	2133	1.07	DTR	not-determined	NA	23	5	0	0.521739	ATATATATATATATATATATATA
VF_VS_56495	2129	1.06	DTR	not-determined	NA	22	2	0	0.5	TATATATATATATATATATATA
VF_VS_56567	2127	1.08	ITR	not-determined	NA	34	2	0	0.5	CACACACACACACACACACACACACACACACACA
VF_VS_56695	2124	1.03	DTR	not-determined	NA	21	4	0	0.52381	AGAGAGAGAGAGAGAGAGAGA
VF_VS_56738	2123	1.38	DTR	not-determined	NA	34	7	0	0.411765	CAACACACTGCAACACACTGCAACACACTGCAAC
VF_VS_56808	2122	1.1	DTR	not-determined	NA	30	3	0	0.5	GAGAGAGAGAGAGAGAGAGAGAGAGAGAGA
VF_VS_56857	2120	1.09	DTR	not-determined	NA	30	2	0	0.5	TACATATATATATATATATATATATATATA
VF_VS_57040	2116	1	ITR	not-determined	NA	20	1	0	0.6	CCCCAAAACCCCAAAACCCC
VF_VS_57112	2114	1.11	DTR	not-determined	NA	38	3	0	0.5	CACACACACACACACACACACACACACACACACACACA
VF_VS_57260	2110	1.14	ITR	not-determined	NA	35	1	0	0.4	TGCAGTGTGTTGCAGTGTGTTGCAGTGTGTTGCAG
VF_VS_57312	2109	1.24	ITR	not-determined	NA	51	1	0	0.509804	CTCTCTCTCTCTCTCTCTCTCTCTCTCTCTCTCTCTCTCTCTCTCTCTCTC
VF_VS_57359	2107	1.13	DTR	not-determined	NA	23	8	0	0.521739	ATATATATATATATATATATATA
VF_VS_57448	2105	1.1	ITR	not-determined	NA	35	1	0	0.514286	TATATATATATATATATATATATATATATATATAT
VF_VS_57657	2101	1.06	DTR	not-determined	NA	64	2	0	0.53125	GAATATTTTGTTGTTGTTTTTGTCAAAACAAAACAAAACAACAAAATGCAAAAACAAAAAACAA
VF_VS_57686	2100	1.08	DTR	not-determined	NA	43	2	0	0.511628	ATATATATATATATATATATATATATATATATATATATATATA
VF_VS_57760	2098	1.11	DTR	not-determined	NA	66	2	0	0.5	ATATATATATATATATATATATATATATATATATATATATATATATATATATATATATATATATAT
VF_VS_57899	2095	1.12	DTR	not-determined	NA	28	7	0	0.5	AGAGAGAGAGAGAGAGAGAGAGAGAGAG
VF_VS_57965	2094	1.09	DTR	not-determined	NA	53	3	0	0.509434	ATATATATATATATATATATATATATATATATATATATATATATATATATATA
VF_VS_57982	2094	1.07	DTR	not-determined	NA	141	2	0	0.361702	CTAAAAAGACGAAAGGGGCGTTTCGTAGGTAACTAGGATAACTCTGTATTCCTTGTCTAGTAAGGTTTACAGGGTTATTATACCTTTATTTTCTCAGTAAATATGTAGAATTAAAGGACAATCGGAAAGAAATTCAACAAA
VF_VS_58180	2089	1.06	DTR	not-determined	NA	141	2	0	0.297872	ACCTGTCACTATTAAACTCCAACAAATGAATGTCACGGCCGTTTGTTTTCAACGAGGGTACGTCTCGGGCCGATATGCAGGCTGTTTGTACGTGAAAACTTTTTTTTCGGCCACCCCTACAGCTGTGCCTGTACAATGGTA
VF_VS_58219	2088	1.03	DTR	not-determined	NA	24	2	0	0.5	TATATATATATATATATATATATA
VF_VS_58252	2088	1.07	DTR	not-determined	NA	35	2	0	0.514286	ACACACACACACACACACACACACACACACACACA
VF_VS_58342	2085	1.06	DTR	not-determined	NA	141	2	0	0.269504	AACTTAGAGCATCACCGTTCTTACTGGCCTACGGAGATCTTGTGCAAGCGAAGGTACTTGCAGCTAACGTTAGAGGCTGGAGTGCAGCATCACCAGCCAATACTGCAGGCGCTCTCGTCTAAGTCGAGCCCTCAGCAGTAG
VF_VS_58504	2082	1.07	ITR	not-determined	NA	23	3	0	0.521739	TATATATATATATATATATATAT
VF_VS_58664	2078	1.06	DTR	high	AAI-based completeness > 90%	141	2	0	0.283688	CAGCAGAGCTGCTACTCAGTTAGCGGAAAAGGCCAAGGGCTTTTCCTACTCGCCCTTTTAGGTTCTGTCTCAAGGACGACGTTATCCAGTTGATTGTGTGGAGCCTGCGGTCCCACTGGGGGTCTCGCTCCGCTCGCTTTC
VF_VS_58854	2074	1.03	ITR	not-determined	NA	31	1	0	0.516129	TATATATATATATATATATATATATATATAT
VF_VS_58855	2074	1.12	DTR	not-determined	NA	21	4	0	0.52381	CACACACACACACACACACAC
VF_VS_59127	2067	1.13	DTR	not-determined	NA	53	2	0	0.509434	ATATATATATATATATATATATATATATATATATATATATATATATATATATA
VF_VS_59207	2066	1.02	DTR	not-determined	NA	42	2	0	0.5	TATATATATACATATATATATATATATATATATATATATATA
VF_VS_59398	2061	1.07	DTR	not-determined	NA	141	2	0	0.312057	GACTTCCTACCCTTTTGTACACGCGTCAATCATACACTGGACACGTGTCATACACACGGACTCCCTGTGAAATTCGGCCACGTGGCATCACGGGGGCGGCATGGGACACGTCATCAATTATCCCCTGCATTTTTTTCCGAC
VF_VS_59411	2061	1.08	DTR	not-determined	NA	118	2	0	0.347458	CAGCTACAACTAATAGAAATACAAACTAGGAGAACTAATCGGGTTCACCCTCCACTACTATAACAATGTACCTGTAGGTACACAATCGAGGGGCGATGCCGGTGGTACGCAGGCGAAA
VF_VS_59541	2058	1.14	DTR	not-determined	NA	93	2	0	0.505376	ATATATATATATATATATATATATATATATATATATATATATATATATATATATATATATATATATATATATATATATATATATATATATATA
VF_VS_59644	2056	1.06	DTR	not-determined	NA	141	2	0	0.333333	AGCACAAACGTGGGTTTGGAGCAGGAAAGTGCAAGAATCCCAGAGAGAAATCCCGAGGCACAGCATGCAGCAAGACAAAATATGCGACAGACATTGTGTCGTACTGAGTATATTACTGTGTGGATGACTGCAAGCGCCCCA
VF_VS_59888	2051	1.1	DTR	not-determined	NA	141	2	0	0.283688	ATCCGACACCAAAGTAACTAGGTTTAACCATTAGTAGGATATGAAAATGTGGGTGGGCGGTAGCATCTTTGGAACGGGTAACTTCGGCAGCGCGTAACCATCCTTCGCCAGGAAATTGTTTAAGTTTTGTAAGACGCTTGA
VF_VS_60120	2046	1.09	DTR	not-determined	NA	45	2	0	0.511111	ACACACACACACACACACACACACACACACACACACACACACACA
VF_VS_60558	2037	1.08	DTR	not-determined	NA	23	5	0	0.521739	ATATATATATATATATATATATA
VF_VS_60764	2033	1.12	DTR	not-determined	NA	27	3	0	0.518519	ACACACACACACACACACACACACACA
VF_VS_60894	2030	1	ITR	not-determined	NA	20	1	0	0.6	CCCCAAAACCCCAAAACCCC
VF_VS_60941	2029	1.11	ITR	not-determined	NA	25	4	0	0.52	ACACACACACACACACACACACACA
VF_VS_61022	2027	1	ITR	not-determined	NA	20	1	0	0.6	CCCCAAAACCCCAAAACCCC
VF_VS_61040	2027	1.05	DTR	not-determined	NA	31	2	0	0.516129	ATATATATATATATATATATATATATATATA
VF_VS_61043	2027	1.03	DTR	not-determined	NA	39	2	0	0.512821	ATATATATATATATATATATATATATATATATATATATA
VF_VS_61509	2017	1.08	DTR	not-determined	NA	45	3	0	0.511111	ATATATATATATATATATATATATATATATATATATATATATATA
VF_VS_61636	2015	1.09	ITR	not-determined	NA	25	1	0	0.52	TATATATATATATATATATATATAT
VF_VS_61777	2012	1.06	DTR	not-determined	NA	20	5	0	0.5	ACACACACACACACACACAC
VF_VS_61953	2008	1.2	DTR	not-determined	NA	141	2	0	0.276596	ACCCGAACTTGTTGGTTACCACGAACTTGTGGGTTAACCTGAACTTGCAGGTTTACCCAAACTTAGGAGTTAACCCAAACTTGTGGGTTAATCCAAATGTGTGGGTAAACCTGAACTTGCAGGTTAACCCAAACTTGCGGG
VF_VS_62032	2006	1.07	ITR	not-determined	NA	33	3	0	0.515152	ATATATATATATATATATATATATATATATATA
VF_VS_62054	2006	1.08	DTR	not-determined	NA	141	2	0	0.304965	GAGACGTGTGTCTCACAGAGTTCGAAACGTGTGTGTGTCACAAATGTAAACTGTGTGTGTGTCACACATTGTTCGTGAACCCTATATCCCGTGATATAAGTTTCTTTCCGCTGACGAATCCTACGAGTCGTGAATCCTACA
VF_VS_62249	2002	1.05	DTR	not-determined	NA	48	2	0	0.5	ATATATATATATATATATATATATATATATATATATATATATATATAC
VF_VS_62293	2001	1.04	DTR	not-determined	NA	21	4	0	0.52381	ATATATATATATATATATATA
VF_VS_62674	19224	1.01	ITR	low	AAI-based completeness < 80%	141	1	0	0.404255	AAGGTTTTGATTCTTTCTCCGACATTCCGTACTGTTTTGCCTTAGCCATAAAAACTCCTAGGTTGGCTTTCTCCTAACAATACCTGTTGTTAGTAATTTTTTTAACACATTTTTTTATTGGCCTAAGCCAGGCTGCATCAT
VF_VS_62773	13650	1.01	ITR	low	HMM-based completeness (upper-bound) < 80%	141	1	0	0.269504	ACAATCCGACATATTCACGACACTGGCAACAGTTGACACCACAACAGAAAACCCGCTACAACGTCGCTGTAGCGGGTTCTATGGGATTTATGGGAATTAGTCGGGCGGGTTGCTCAACTCTGCTTTAAGCGCTTCTAAGGT
VF_VS_62874	10864	1.01	ITR	low	AAI-based completeness < 80%	138	1	0	0.297101	GGTGGAAATCACCTCCCGACATAACTCGTCTTTGAACTCCTGGGCGAAACGTCGACGTGTGGCGGACATGCTGTTCTCTCTTTCAGTGACACCCTCATTTTAAGAGGGCCCACTGTCCGAAAACACCGTGGCAGTCCA
VF_VS_63488	6926	1.03	DTR	not-determined	NA	88	2	0	0.386364	AATAAACACATTCCAAAAAGTGGCTCGCCGCTGCGAAGCAGCAAAATAAACACATTCCAAAAAGTGGCTCGCCGCTGCGAAGCAGCAA
VF_VS_63490	13619	1	DTR	not-determined	NA	30	3	0	0.666667	AACCCCAACCCCAACCCCAACCCCAACCCC
VF_VS_63647	37193	1	ITR	not-determined	NA	35	1	0	0.314286	TCCAAGTTGATGGGGCAGAATATCCCAAACGGTGA
VF_VS_63889	24616	1.01	ITR	low	HMM-based completeness (upper-bound) < 80%	76	1	0	0.289474	AGCGTTTGTTTCGTAATCTATGTCAGGGAAGTGAACGCCAGAGGCAGAAGACCGTGCAGAATTCGCACCCCCCCCC
VF_VS_64149	19053	1.02	ITR	low	HMM-based completeness (upper-bound) < 80%	141	1	0	0.397163	TCCTCTCCCTATAATATATATTATCTTTTTCTACTCCTCCCAAAAATAATAAATAATAAATAATAAATAATAATAAATAGTTCTAATAAATAGTTCTAATAAATAGTTCTTTTGAATTCTTTTGAATTCTTGGGAGGAAAG
VF_VS_64168	18776	1.01	ITR	low	HMM-based completeness (upper-bound) < 80%	141	1	0	0.453901	TTCCCGGACTCCAAGCGAAAATCAACAAACTAATGCGGTAACAGGTAACAGGTAACAAGATTAAAAAAAAAACATATATATTATTAAAAAAACAAGTAACAAGTATTAATACAATCATTCTTTTTCTTTTTTAATTATTTA
VF_VS_64307	16590	1.01	ITR	not-determined	NA	141	1	0	0.319149	ACCACAGAGATCATCCTCCGCTGCGCAAAGCTTGCGGATCGGATCGCCGTTCGTGTACAGCGGCTGGCCCGCTGGGAATGGCGCCGAGACAGCACCAATGTGCGTCGGAAGCATGCCTTCAACTTGACCGCCGTCGCAGAA
VF_VS_65303	8953	1	ITR	not-determined	NA	20	1	0	0.6	CCCCAAAACCCCAAAACCCC
VF_VS_65361	8621	1	ITR	not-determined	NA	20	1	0	0.6	CCCCAAAACCCCAAAACCCC
VF_VS_65481	8154	2	ITR	low	Multiple genome copies detected	1000	1	0	0.271	CTTCAGAGTTCAGTGTTTGACCAATGTGGTCTTTCTCAAACGCTTTCTTGAACACGTTAAACTCATTCTGGCTAAGGCGTTGAGCATTGCTCCTATCAGATGTAAATATCCAAAGGTTTGCGAGGCTTATCTGCCCACTTTATAGATAAAGATCGTCACAAAAAATTCCTTTTTTCGCAATCAGTCTTTTTAAGTCTTCCATTTTCCTTTTATCGTTTTATTTAGAAGCGACCGCCACTTGCACAAAAGTATAGTACCAGGAAGCAGCATCGTCGCTCCAGGCAGCAGGCAGCGATCGCCCCTTGACCAGCAGCTTGGACAACTCCGCGATCGCCCCTTGTAATTACAATGAGATCGCCAAAAATTAAAATTTCTGGCGCTCGCTCTGAGGGATTTATT…
VF_VS_65542	7979	1.03	ITR	not-determined	NA	141	1	0	0.304965	TGGATCGAGCGGAAGTATCACCGGCAGCGCCGTCAGGCAGCGTTGGGCCGTTTGACCCCTATCGAGTTCGAGACCATGATGAGCACGAGCACGGCCGTTGCCGCGTGACTAAACCTGTCACCTAAACGTGCATCAGTCCCT
VF_VS_65564	7902	2	ITR	low	Multiple genome copies detected	1000	1	0	0.387	AGCTGAATTTACTAGGTCTGATAAAAATTGATATATATAATTTACCTTTCAGGGATTTTTAAAAATAAAATAAAAAATTGATTTTTAAAAATTATTATTTTAAAAAAAATTATAAAAAACAAAAAAATGAATTCTGAACTCTTAGCTGAATTACTTGAATTAGCTGGTAATAATTTAAATGAGGGTAATTACCTTATTGTTGCTGAATATTTTAAACAAATACACAAAGATGTATCAATAATAGATAACAGGGTTGTAAAAACCCTTACTACGCCTATTAGAATTGTGTATAATAATGCCGGTTATTTTGATGTAACCGCATATAGTTGGAAGCCCGAGGATGGATATTCCAATAATCCCTCTACGGATATGATGCTAATAATAAAACATAATGACAAT…
VF_VS_65915	6367	1	ITR	not-determined	NA	20	1	0	0.6	CCCCAAAACCCCAAAACCCC
VF_VS_66080	5680	1	ITR	not-determined	NA	20	1	0	0.6	CCCCAAAACCCCAAAACCCC
VF_VS_66087	5642	1	ITR	not-determined	NA	20	1	0	0.6	CCCCAAAACCCCAAAACCCC
VF_VS_66094	5614	2	ITR	low	Multiple genome copies detected	1000	1	0	0.368	AGCGGCTCGATCCTCGCGATCCTCGCCGTCCTCGTGGTCCTCGCCGGCCCGGCCCTCCTCGCGGCGTGGCCCTCGTCTACGGTCCCTGTCGTCTGCCTCTCCCTGCGACAGACCGCCTCGATCACGGCGACGACGGCCTCCGTCGTCAAACTCAAGGTCCCATTCAACTGCCGCGTCATCCGAATCCAGGCCGGCGTCGGGGCGATTGACGACGCGACCGACGTGGACCTCGTCGTGAGCAACGATCCGGCCAGCGGCTCGGATTACGACGTCAGCGGCACCCTCGCCGTCGCGGACTCGTCGACGATCGTGGCCGGCGGCGTCGGCGGCGACCCGGTCGACGGCGTCGAGGTCCTCACGGAGGACGCCGTCCTCTACATGGGCGCGACCATCGCGGGC…
VF_VS_66109	5560	1	ITR	not-determined	NA	20	1	0	0.6	CCCCAAAACCCCAAAACCCC
